# Supplementary material for: Integrating multi-omics data reveals function and therapeutic potential of deubiquitinating enzymes
Source: bioRxiv preprint, doi:10.1101/2021.08.06.455458, version 1 (2021-08-07)
Supplement: Supplemental Table 1 [file 455458_file02.xlsx]

## Sheet: DUB CRISPR library
Dharmacon EDIT-R™ crRNA Library - Human Deubiquitinating Enzymes
GC-004700 Lot 17107
PlateName	Well	CatalogNumber	GeneSymbol	GeneID	TargetSequence	GenomicLocation	PAM	AccessionExons	UniprotID	Entry name	Protein names
Plate 1 crRNA 1	A02	CM-005791-01	BAP1	8314	GATGAACTCATCGTAGTTGT	hg38|+chr3:52402633-52402655	GGG	NM_004656.3 (Exon16),NM_004656.3 (Exon16)	Q92560	BAP1_HUMAN	Ubiquitin carboxyl-terminal hydrolase BAP1 (EC 3.4.19.12) (BRCA1-associated protein 1) (Cerebral protein 6)
Plate 1 crRNA 1	A03	CM-005814-01	COPS5	10987	TGCCAGATCGGGAGGCAACT	hg38|-chr8:67059363-67059385	TGG	NM_006837.2 (Exon2)	Q92905	CSN5_HUMAN	COP9 signalosome complex subunit 5 (SGN5) (Signalosome subunit 5) (EC 3.4.-.-) (Jun activation domain-binding protein 1)
Plate 1 crRNA 1	A04	CM-005798-01	BRCC3	79184	GCTCTGGAGAAATTTCTACT	hg38|-chrX:155077238-155077260	CGG	NM_001018055.2 (Exon4),NM_001242640.1 (Exon4),NM_024332.3 (Exon4)	P46736	BRCC3_HUMAN	Lys-63-specific deubiquitinase BRCC36 (EC 3.4.19.-) (BRCA1-A complex subunit BRCC36) (BRCA1/BRCA2-containing complex subunit 3) (BRCA1/BRCA2-containing complex subunit 36) (BRISC complex subunit BRCC36)
Plate 1 crRNA 1	A05	CM-004609-01	CYLD	1540	TTCCATCCCAGTTGCCAATA	hg38|-chr16:50754324-50754346	GGG	NM_015247.2 (Exon6),NM_001042355.1 (Exon5),NM_001042412.1 (Exon5)	Q9NQC7	CYLD_HUMAN	Ubiquitin carboxyl-terminal hydrolase CYLD (EC 3.4.19.12) (Deubiquitinating enzyme CYLD) (Ubiquitin thioesterase CYLD) (Ubiquitin-specific-processing protease CYLD)
Plate 1 crRNA 1	A06	CM-027332-01	USP17L2	377630	TCATGTCATCCAGCCCTCAC	hg38|-chr8:12138319-12138341	AGG	NM_201402 (Exon1)	Q6R6M4	U17L2_HUMAN	Ubiquitin carboxyl-terminal hydrolase 17 (USP17) (EC 3.4.19.12) (Deubiquitinating enzyme 17-like protein 2) (Deubiquitinating protein 3) (DUB-3) (Ubiquitin carboxyl-terminal hydrolase 17-like protein 2) (Ubiquitin thioesterase 17-like protein 2) (Ubiquitin-specific-processing protease 17-like protein 2)
Plate 1 crRNA 1	A07	CM-013606-01	FBXO7	25793	TACATGCATCCTCTCTGCGA	hg38|+chr22:32485134-32485156	GGG	NM_001257990 (Exon4),NM_012179 (Exon4),NM_001033024 (Exon4)	Q9Y3I1	FBX7_HUMAN	F-box only protein 7
Plate 1 crRNA 1	A08	CM-012435-01	FBXO8	26269	GATACTCTCCACGCTCTTCA	hg38|+chr4:174239075-174239097	GGG	NM_012180.2 (Exon5)	Q9NRD0	FBX8_HUMAN	F-box only protein 8 (F-box/SEC7 protein FBS)
Plate 1 crRNA 1	A09	CM-018630-01	MPND	84954	GCTGTGGTACCAGCCCACCA	hg38|-chr19:4357284-4357306	GGG	NM_001159846 (Exon7),NM_032868 (Exon9),NM_001300862 (Exon9)	Q8N594	MPND_HUMAN	MPN domain-containing protein (EC 3.4.-.-)
Plate 1 crRNA 1	A10	CM-017674-01	JOSD1	9929	CTTCTTGTGAGGTGTCACCA	hg38|+chr22:38689388-38689410	TGG	NM_014876.5 (Exon2)	Q15040	JOS1_HUMAN	Josephin-1 (EC 3.4.19.12) (Josephin domain-containing protein 1)
Plate 1 crRNA 1	A11	CM-005905-01	MYSM1	114803	TTGTGTGTCAATATCTCGTA	hg38|+chr1:58667050-58667072	AGG	NM_001085487 (Exon16)	Q5VVJ2	MYSM1_HUMAN	Histone H2A deubiquitinase MYSM1 (2A-DUB) (EC 3.4.19.-) (Myb-like, SWIRM and MPN domain-containing protein 1)
Plate 1 crRNA 1	B02	CM-021061-01	OTUB1	55611	GGAGCTCTCGGTCCTATACA	hg38|+chr11:63988689-63988711	AGG	NM_017670.2 (Exon3),NR_003089.1 (Exon3)	Q96FW1	OTUB1_HUMAN	Ubiquitin thioesterase OTUB1 (EC 3.4.19.12) (Deubiquitinating enzyme OTUB1) (OTU domain-containing ubiquitin aldehyde-binding protein 1) (Otubain-1) (hOTU1) (Ubiquitin-specific-processing protease OTUB1)
Plate 1 crRNA 1	B03	CM-010983-01	OTUB2	78990	AAAGACTTCTGCACTCACGT	hg38|+chr14:94044763-94044785	AGG	NM_023112.3 (Exon5)	Q96DC9	OTUB2_HUMAN	Ubiquitin thioesterase OTUB2 (EC 3.4.19.12) (Deubiquitinating enzyme OTUB2) (OTU domain-containing ubiquitin aldehyde-binding protein 2) (Otubain-2) (Ubiquitin-specific-processing protease OTUB2)
Plate 1 crRNA 1	B04	CM-026487-01	OTUD1	220213	ACACCGTCTTGCTGACAGCT	hg38|-chr10:23440423-23440445	CGG	NM_001145373 (Exon1)	Q5VV17	OTUD1_HUMAN	OTU domain-containing protein 1 (EC 3.4.19.12) (DUBA-7)
Plate 1 crRNA 1	B05	CM-009927-01	OTUD4	54726	TCTTCAATACAGGAATGGGT	hg38|-chr4:145165187-145165209	AGG	NM_001102653 (Exon4),NM_017493 (Exon3)	Q01804	OTUD4_HUMAN	OTU domain-containing protein 4 (EC 3.4.19.12) (HIV-1-induced protein HIN-1)
Plate 1 crRNA 1	B06	CM-013823-01	OTUD5	55593	ATCCCGCAACCACTGCAGGT	hg38|+chrX:48925886-48925908	AGG	NM_001136159 (Exon6),NM_001136158 (Exon6),NM_001136157 (Exon6),NM_017602 (Exon6)	Q96G74	OTUD5_HUMAN	OTU domain-containing protein 5 (EC 3.4.19.12) (Deubiquitinating enzyme A) (DUBA)
Plate 1 crRNA 1	B07	CM-008553-01	OTUD6B	51633	GCTGACTACTAAGGAGAATA	hg38|+chr8:91071268-91071290	AGG	NM_001286745 (Exon2),NM_016023 (Exon2)	Q8N6M0	OTU6B_HUMAN	Deubiquitinase OTUD6B (EC 3.4.19.12) (DUBA-5) (OTU domain-containing protein 6B)
Plate 1 crRNA 1	B08	CM-008841-01	OTUD7A	161725	GTTGCATTCACTTGCCACGT	hg38|+chr15:31559105-31559127	GGG	NM_130901 (Exon3)	Q8TE49	OTU7A_HUMAN	OTU domain-containing protein 7A (EC 3.4.19.12) (Zinc finger protein Cezanne 2)
Plate 1 crRNA 1	B09	CM-008670-01	OTUD7B	56957	GTGACGGTGACCCATCTTCA	hg38|+chr1:149944526-149944548	GGG	NM_020205 (Exon12),NM_020205.3 (Exon12)	Q6GQQ9	OTU7B_HUMAN	OTU domain-containing protein 7B (EC 3.4.19.12) (Cellular zinc finger anti-NF-kappa-B protein) (Cezanne) (Zinc finger A20 domain-containing protein 1) (Zinc finger protein Cezanne)
Plate 1 crRNA 1	B10	CM-016115-01	PARP11	57097	ACATAGCTCCCGTCTTTGGA	hg38|+chr12:3812226-3812248	AGG	NM_020367.5 (Exon8),NR_104461.1 (Exon9),NM_001286522.1 (Exon8),NM_001286521.1 (Exon7)	Q9NR21	PAR11_HUMAN	Protein mono-ADP-ribosyltransferase PARP11 (EC 2.4.2.-) (ADP-ribosyltransferase diphtheria toxin-like 11) (ARTD11) (Poly [ADP-ribose] polymerase 11) (PARP-11)
Plate 1 crRNA 1	B11	CM-012252-01	PRPF8	10594	GATCCGTTCTCGGTTGTAGT	hg38|+chr17:1676610-1676632	GGG	NM_006445 (Exon16)	Q6P2Q9	PRP8_HUMAN	Pre-mRNA-processing-splicing factor 8 (220 kDa U5 snRNP-specific protein) (PRP8 homolog) (Splicing factor Prp8) (p220)
Plate 1 crRNA 1	C02	CM-006024-01	PSMD14	10213	ATAGGCAATACCTGGATAGA	hg38|-chr2:161385560-161385582	TGG	NM_005805.5 (Exon8)	O00487	PSDE_HUMAN	26S proteasome non-ATPase regulatory subunit 14 (EC 3.4.19.-) (26S proteasome regulatory subunit RPN11) (26S proteasome-associated PAD1 homolog 1)
Plate 1 crRNA 1	C03	CM-015500-01	JOSD2	126119	TCACCTCTTGCAGATCTCAT	hg38|+chr19:50510282-50510304	CGG	NM_138334.3 (Exon2),NM_001270686.1 (Exon2),NM_001270641.1 (Exon2),NM_001270639.1 (Exon2),NM_001270640.1 (Exon2)	Q8TAC2	JOS2_HUMAN	Josephin-2 (EC 3.4.19.12) (Josephin domain-containing protein 2)
Plate 1 crRNA 1	C04	CM-006033-01	SENP2	59343	GTATGTACAGATGGCTGGTT	hg38|+chr3:185586412-185586434	AGG	NM_021627.2 (Exon1)	Q9HC62	SENP2_HUMAN	Sentrin-specific protease 2 (EC 3.4.22.-) (Axam2) (SMT3-specific isopeptidase 2) (Smt3ip2) (Sentrin/SUMO-specific protease SENP2)
Plate 1 crRNA 1	C05	CM-012202-01	STAMBP	10617	CTGTATGGATGAGACTGTTA	hg38|-chr2:73847640-73847662	AGG	NM_006463.4 (Exon6),NM_201647.2 (Exon5),NM_213622.2 (Exon5)	O95630	STABP_HUMAN	STAM-binding protein (EC 3.4.19.-) (Associated molecule with the SH3 domain of STAM) (Endosome-associated ubiquitin isopeptidase)
Plate 1 crRNA 1	C06	CM-005783-01	STAMBPL1	57559	TTTACTGTGAATTCTCTGGT	hg38|+chr10:88901721-88901743	AGG	NM_020799.3 (Exon2)	Q96FJ0	STALP_HUMAN	AMSH-like protease (AMSH-LP) (EC 3.4.19.-) (STAM-binding protein-like 1)
Plate 1 crRNA 1	C07	CM-009919-01	TNFAIP3	7128	CTGTCCTTCAGGGTCACCAA	hg38|-chr6:137876136-137876158	GGG	NM_001270508.1 (Exon5),NM_001270507.1 (Exon5),NM_006290.3 (Exon5)	P21580	TNAP3_HUMAN	Tumor necrosis factor alpha-induced protein 3 (TNF alpha-induced protein 3) (EC 2.3.2.-) (EC 3.4.19.12) (OTU domain-containing protein 7C) (Putative DNA-binding protein A20) (Zinc finger protein A20) [Cleaved into: A20p50; A20p37]
Plate 1 crRNA 1	C08	CM-012786-01	UBL3	5412	TATCAAGGACGATTTCTACA	hg38|-chr13:29772129-29772151	TGG	NM_007106.3 (Exon3)	O95164	UBL3_HUMAN	Ubiquitin-like protein 3 (Membrane-anchored ubiquitin-fold protein) (HsMUB) (MUB) (Protein HCG-1)
Plate 1 crRNA 1	C09	CM-020658-01	UBL4A	8266	CATGCTCCGAGAATTCTATT	hg38|+chrX:154485524-154485546	TGG	NM_014235.4 (Exon4)	P11441	UBL4A_HUMAN	Ubiquitin-like protein 4A (Ubiquitin-like protein GDX)
Plate 1 crRNA 1	C10	CM-014320-01	UBL5	59286	GTTCCAACGGGTACCAGTTT	hg38|-chr19:9828633-9828655	GGG	NM_024292.3 (Exon3),NM_001048241.2 (Exon3),NM_024292.3 (Exon3),NM_001048241.2 (Exon3)	Q9BZL1	UBL5_HUMAN	Ubiquitin-like protein 5
Plate 1 crRNA 1	C11	CM-010691-01	UBR1	197131	ATGTCGTAGAAATGACTATA	hg38|-chr15:43070833-43070855	TGG	NM_174916 (Exon5)	Q8IWV7	UBR1_HUMAN	E3 ubiquitin-protein ligase UBR1 (EC 2.3.2.27) (N-recognin-1) (RING-type E3 ubiquitin transferase UBR1) (Ubiquitin-protein ligase E3-alpha-1) (Ubiquitin-protein ligase E3-alpha-I)
Plate 1 crRNA 1	D02	CM-018385-01	UBTD1	80019	TGAAGAAAGAGCGGCTTAAG	hg38|+chr10:97567929-97567951	TGG	NM_024954.4 (Exon2)	Q9HAC8	UBTD1_HUMAN	Ubiquitin domain-containing protein 1
Plate 1 crRNA 1	D03	CM-016592-01	UBTD2	92181	GTGTTGGGTTCTGCACAGGT	hg38|+chr5:172211844-172211866	TGG	NM_152277 (Exon3)	Q8WUN7	UBTD2_HUMAN	Ubiquitin domain-containing protein 2 (Dendritic cell-derived ubiquitin-like protein) (DC-UbP) (Ubiquitin-like protein SB72)
Plate 1 crRNA 1	D04	CM-004309-01	UCHL1	7345	TTCCTGTGCCACGGCATCAT	hg38|-chr4:41261889-41261911	GGG	NM_004181.4 (Exon6)	P09936	UCHL1_HUMAN	Ubiquitin carboxyl-terminal hydrolase isozyme L1 (UCH-L1) (EC 3.4.19.12) (Neuron cytoplasmic protein 9.5) (PGP 9.5) (PGP9.5) (Ubiquitin thioesterase L1)
Plate 1 crRNA 1	D05	CM-006059-01	UCHL3	7347	TGAAGAACGAGCCAGATACC	hg38|+chr13:75567279-75567301	TGG	NM_006002.4 (Exon5),NM_001270952.1 (Exon5)	P15374	UCHL3_HUMAN	Ubiquitin carboxyl-terminal hydrolase isozyme L3 (UCH-L3) (EC 3.4.19.12) (Ubiquitin thioesterase L3)
Plate 1 crRNA 1	D06	CM-006060-01	UCHL5	51377	ATGATTGGATCAGTGCAGTA	hg38|-chr1:193028111-193028133	AGG	NM_015984.3 (Exon7),NM_001199263.1 (Exon7),NM_001199262.1 (Exon7),NM_001199261.1 (Exon7),NR_037607.1 (Exon7)	Q9Y5K5	UCHL5_HUMAN	Ubiquitin carboxyl-terminal hydrolase isozyme L5 (UCH-L5) (EC 3.4.19.12) (Ubiquitin C-terminal hydrolase UCH37) (Ubiquitin thioesterase L5)
Plate 1 crRNA 1	D07	CM-005077-01	UCK2	7371	GAACAGGTCTCGTACCTCCT	hg38|-chr1:165896258-165896280	GGG	NM_012474.4 (Exon4)	Q9BZX2	UCK2_HUMAN	Uridine-cytidine kinase 2 (UCK 2) (EC 2.7.1.48) (Cytidine monophosphokinase 2) (Testis-specific protein TSA903) (Uridine monophosphokinase 2)
Plate 1 crRNA 1	D08	CM-008494-01	UEVLD	55293	ACCTAACTGTGGAAGAACTA	hg38|-chr11:18578773-18578795	AGG	NM_001261386 (Exon2),NM_001297771 (Exon2),NM_001261385 (Exon2),NM_001261383 (Exon2),NM_018314 (Exon2),NM_001261382 (Exon2),NM_001040697 (Exon2)	Q8IX04	UEVLD_HUMAN	Ubiquitin-conjugating enzyme E2 variant 3 (UEV-3) (EV and lactate/malate dehydrogenase domain-containing protein)
Plate 1 crRNA 1	D09	CM-017918-01	UFD1L	7353	GATGGAGACCAAACCCGACA	hg38|-chr22:19458100-19458122	AGG	NM_005659 (Exon7),NM_001035247 (Exon7)	Q92890	UFD1_HUMAN	Ubiquitin recognition factor in ER-associated degradation protein 1 (Ubiquitin fusion degradation protein 1) (UB fusion protein 1)
Plate 1 crRNA 1	D10	CM-006061-01	USP1	7398	GGTATTTCTTCTACCTTAGT	hg38|-chr1:62444868-62444890	AGG	NM_003368.4 (Exon6),NM_001017416.1 (Exon6),NM_001017415.1 (Exon6)	O94782	UBP1_HUMAN	Ubiquitin carboxyl-terminal hydrolase 1 (EC 3.4.19.12) (Deubiquitinating enzyme 1) (hUBP) (Ubiquitin thioesterase 1) (Ubiquitin-specific-processing protease 1)
Plate 1 crRNA 1	D11	CM-006062-01	USP10	9100	TTTGTTCAGACTCCAATCAC	hg38|+chr16:84764220-84764242	CGG	NR_073578.1 (Exon7),NM_001272075.1 (Exon11),NM_005153.2 (Exon10),NR_073577.1 (Exon8)	Q14694	UBP10_HUMAN	Ubiquitin carboxyl-terminal hydrolase 10 (EC 3.4.19.12) (Deubiquitinating enzyme 10) (Ubiquitin thioesterase 10) (Ubiquitin-specific-processing protease 10)
Plate 1 crRNA 1	E02	CM-006063-01	USP11	8237	GTGGCTCTGTCCAAACACAC	hg38|+chrX:47242484-47242506	GGG	NM_004651 (Exon11)	P51784	UBP11_HUMAN	Ubiquitin carboxyl-terminal hydrolase 11 (EC 3.4.19.12) (Deubiquitinating enzyme 11) (Ubiquitin thioesterase 11) (Ubiquitin-specific-processing protease 11)
Plate 1 crRNA 1	E03	CM-027148-01	USP12	219333	GCCTCCATCTGTACCATGGT	hg38|-chr13:27171587-27171609	AGG	NM_182488.3 (Exon1),NM_182488.3 (Exon1)	O75317	UBP12_HUMAN	Ubiquitin carboxyl-terminal hydrolase 12 (EC 3.4.19.12) (Deubiquitinating enzyme 12) (Ubiquitin thioesterase 12) (Ubiquitin-hydrolyzing enzyme 1) (Ubiquitin-specific-processing protease 12)
Plate 1 crRNA 1	E04	CM-006064-01	USP13	8975	GCTGGTAACTCCTCAATATT	hg38|-chr3:179701103-179701125	TGG	NM_003940 (Exon4)	Q92995	UBP13_HUMAN	Ubiquitin carboxyl-terminal hydrolase 13 (EC 3.4.19.12) (Deubiquitinating enzyme 13) (Isopeptidase T-3) (ISOT-3) (Ubiquitin thioesterase 13) (Ubiquitin-specific-processing protease 13)
Plate 1 crRNA 1	E05	CM-006065-01	USP14	9097	TCATACATATCCAACATAAG	hg38|-chr18:204576-204598	AGG	NM_005151.3 (Exon13),NM_001037334.1 (Exon12)	P54578	UBP14_HUMAN	Ubiquitin carboxyl-terminal hydrolase 14 (EC 3.4.19.12) (Deubiquitinating enzyme 14) (Ubiquitin thioesterase 14) (Ubiquitin-specific-processing protease 14)
Plate 1 crRNA 1	E06	CM-006066-01	USP15	9958	TACTGTTGCCAACTGAAGGT	hg38|+chr12:62302841-62302863	TGG	NM_006313 (Exon3),NM_001252078 (Exon3),NM_001252079 (Exon3)	Q9Y4E8	UBP15_HUMAN	Ubiquitin carboxyl-terminal hydrolase 15 (EC 3.4.19.12) (Deubiquitinating enzyme 15) (Ubiquitin thioesterase 15) (Ubiquitin-specific-processing protease 15) (Unph-2) (Unph4)
Plate 1 crRNA 1	E07	CM-006067-01	USP16	10600	GATGATTCCTCTGAAACTTT	hg38|+chr21:29027953-29027975	AGG	NM_006447.2 (Exon2),NM_001032410.1 (Exon3),NM_001001992.1 (Exon2)	Q9Y5T5	UBP16_HUMAN	Ubiquitin carboxyl-terminal hydrolase 16 (EC 3.4.19.12) (Deubiquitinating enzyme 16) (Ubiquitin thioesterase 16) (Ubiquitin-processing protease UBP-M) (Ubiquitin-specific-processing protease 16)
Plate 1 crRNA 1	E08	CM-004236-01	USP18	11274	GCAAATCTGTCAGTCCATCC	hg38|+chr22:18157690-18157712	TGG	NM_017414.3 (Exon2)	Q9UMW8	UBP18_HUMAN	Ubl carboxyl-terminal hydrolase 18 (EC 3.4.19.-) (43 kDa ISG15-specific protease) (hUBP43) (ISG15-specific-processing protease) (Ubl thioesterase 18)
Plate 1 crRNA 1	E09	CM-006068-01	USP19	10869	ATGGGAGGCACCATGCATGT	hg38|+chr3:49115611-49115633	AGG	NM_001199160 (Exon12),NM_001199162 (Exon12),NM_001199161 (Exon12),NM_006677 (Exon11),NM_006677.2 (Exon11),NM_001199160.1 (Exon12),NM_001199162.1 (Exon12),NM_001199161.1 (Exon12)	O94966	UBP19_HUMAN	Ubiquitin carboxyl-terminal hydrolase 19 (EC 3.4.19.12) (Deubiquitinating enzyme 19) (Ubiquitin thioesterase 19) (Ubiquitin-specific-processing protease 19) (Zinc finger MYND domain-containing protein 9)
Plate 1 crRNA 1	E10	CM-006069-01	USP2	9099	TACATGCGGGACCTGCACCA	hg38|-chr11:119359566-119359588	CGG	NM_171997 (Exon3),NM_004205 (Exon4),NM_001243759 (Exon3),NM_004205.4 (Exon4),NM_171997.2 (Exon3),NM_001243759.1 (Exon3)	O75604	UBP2_HUMAN	Ubiquitin carboxyl-terminal hydrolase 2 (EC 3.4.19.12) (41 kDa ubiquitin-specific protease) (Deubiquitinating enzyme 2) (Ubiquitin thioesterase 2) (Ubiquitin-specific-processing protease 2)
Plate 1 crRNA 1	E11	CM-006070-01	USP20	10868	GCTGCCAGCACTCAATACCT	hg38|-chr9:129869310-129869332	GGG	NM_006676.7 (Exon13),NM_001110303.3 (Exon13),NM_001008563.4 (Exon13),NM_006676.7 (Exon13),NM_001110303.3 (Exon13),NM_001008563.4 (Exon13)	Q9Y2K6	UBP20_HUMAN	Ubiquitin carboxyl-terminal hydrolase 20 (EC 3.4.19.12) (Deubiquitinating enzyme 20) (Ubiquitin thioesterase 20) (Ubiquitin-specific-processing protease 20) (VHL-interacting deubiquitinating enzyme 2) (hVDU2)
Plate 1 crRNA 1	F02	CM-006071-01	USP21	27005	TATGGAGCACGAGGATTCGA	hg38|-chr1:161164593-161164615	GGG	NM_012475.4 (Exon10),NM_001014443.2 (Exon11)	Q9UK80	UBP21_HUMAN	Ubiquitin carboxyl-terminal hydrolase 21 (EC 3.4.19.12) (Deubiquitinating enzyme 21) (Ubiquitin thioesterase 21) (Ubiquitin-specific-processing protease 21)
Plate 1 crRNA 1	F03	CM-006072-01	USP22	23326	ATTTGTGTCCAGGTCTGCGT	hg38|-chr17:21018101-21018123	GGG	NM_015276 (Exon5)	Q9UPT9	UBP22_HUMAN	Ubiquitin carboxyl-terminal hydrolase 22 (EC 3.4.19.12) (Deubiquitinating enzyme 22) (Ubiquitin thioesterase 22) (Ubiquitin-specific-processing protease 22)
Plate 1 crRNA 1	F04	CM-006073-01	USP24	23358	GATACCTTCACTGTCGAGGT	hg38|-chr1:55138603-55138625	AGG	NM_015306 (Exon26)	Q9UPU5	UBP24_HUMAN	Ubiquitin carboxyl-terminal hydrolase 24 (EC 3.4.19.12) (Deubiquitinating enzyme 24) (Ubiquitin thioesterase 24) (Ubiquitin-specific-processing protease 24)
Plate 1 crRNA 1	F05	CM-006074-01	USP25	29761	GACACCTACAGAAGTTTGGA	hg38|+chr21:15791547-15791569	GGG	NM_001283042.1 (Exon5),NM_001283041.1 (Exon5),NM_013396.4 (Exon5)	Q9UHP3	UBP25_HUMAN	Ubiquitin carboxyl-terminal hydrolase 25 (EC 3.4.19.12) (Deubiquitinating enzyme 25) (USP on chromosome 21) (Ubiquitin thioesterase 25) (Ubiquitin-specific-processing protease 25)
Plate 1 crRNA 1	F06	CM-006075-01	USP26	83844	ATTGGAACCCAGTGCAAGTA	hg38|+chrX:133025839-133025861	GGG	NM_031907 (Exon1)	Q9BXU7	UBP26_HUMAN	Ubiquitin carboxyl-terminal hydrolase 26 (EC 3.4.19.12) (Deubiquitinating enzyme 26) (Ubiquitin thioesterase 26) (Ubiquitin-specific-processing protease 26)
Plate 1 crRNA 1	F07	CM-031532-01	USP27X	389856	ACCAGGTGCAGTAACTTATA	hg38|-chrX:49880734-49880756	GGG	NM_001145073.2 (Exon1)	A6NNY8	UBP27_HUMAN	Ubiquitin carboxyl-terminal hydrolase 27 (EC 3.4.19.12) (Deubiquitinating enzyme 27) (Ubiquitin carboxyl-terminal hydrolase 22-like) (Ubiquitin thioesterase 27) (Ubiquitin-specific-processing protease 27) (X-linked ubiquitin carboxyl-terminal hydrolase 27)
Plate 1 crRNA 1	F08	CM-006076-01	USP28	57646	CTGGTAGGCATATACCAGGT	hg38|+chr11:113803242-113803264	AGG	NM_001301029 (Exon20),NM_020886 (Exon23)	Q96RU2	UBP28_HUMAN	Ubiquitin carboxyl-terminal hydrolase 28 (EC 3.4.19.12) (Deubiquitinating enzyme 28) (Ubiquitin thioesterase 28) (Ubiquitin-specific-processing protease 28)
Plate 1 crRNA 1	F09	CM-006077-01	USP29	57663	ATGAGAGTCAAGAGGCACCT	hg38|-chr19:57129490-57129512	GGG	NM_020903.2 (Exon4)	Q9HBJ7	UBP29_HUMAN	Ubiquitin carboxyl-terminal hydrolase 29 (EC 3.4.19.12) (Deubiquitinating enzyme 29) (Ubiquitin thioesterase 29) (Ubiquitin-specific-processing protease 29)
Plate 1 crRNA 1	F10	CM-006078-01	USP3	9960	TAGATTCTGTCCCACATATG	hg38|-chr15:63574109-63574131	AGG	NM_006537.3 (Exon10),NM_001256702.1 (Exon9),NR_046341.1 (Exon11),NR_046342.1 (Exon11)	Q9Y6I4	UBP3_HUMAN	Ubiquitin carboxyl-terminal hydrolase 3 (EC 3.4.19.12) (Deubiquitinating enzyme 3) (Ubiquitin thioesterase 3) (Ubiquitin-specific-processing protease 3)
Plate 1 crRNA 1	F11	CM-021294-01	USP30	84749	TTCATGAACTCCCTGCTACA	hg38|+chr12:109057964-109057986	AGG	NM_001301175 (Exon6),NM_032663 (Exon3)	Q70CQ3	UBP30_HUMAN	Ubiquitin carboxyl-terminal hydrolase 30 (EC 3.4.19.12) (Deubiquitinating enzyme 30) (Ubiquitin thioesterase 30) (Ubiquitin-specific-processing protease 30) (Ub-specific protease 30)
Plate 1 crRNA 1	G02	CM-022513-01	USP31	57478	GGATTTGCGAGCGGACAGCA	hg38|+chr16:23068172-23068194	GGG	NM_020718.3 (Exon16)	Q70CQ4	UBP31_HUMAN	Ubiquitin carboxyl-terminal hydrolase 31 (EC 3.4.19.12) (Deubiquitinating enzyme 31) (Ubiquitin thioesterase 31) (Ubiquitin-specific-processing protease 31)
Plate 1 crRNA 1	G03	CM-006080-01	USP32	84669	GTGGGAGTGGGCTCGCTAAC	hg38|+chr17:60198291-60198313	CGG	NM_032582 (Exon27),NM_032582.3 (Exon27)	Q8NFA0	UBP32_HUMAN	Ubiquitin carboxyl-terminal hydrolase 32 (EC 3.4.19.12) (Deubiquitinating enzyme 32) (Renal carcinoma antigen NY-REN-60) (Ubiquitin thioesterase 32) (Ubiquitin-specific-processing protease 32)
Plate 1 crRNA 1	G04	CM-006081-01	USP33	23032	CAGATCTTGAAAGGTCTCGA	hg38|+chr1:77722164-77722186	GGG	NM_201626.2 (Exon14),NM_201624.2 (Exon13),NM_015017.4 (Exon14)	Q8TEY7	UBP33_HUMAN	Ubiquitin carboxyl-terminal hydrolase 33 (EC 3.4.19.12) (Deubiquitinating enzyme 33) (Ubiquitin thioesterase 33) (Ubiquitin-specific-processing protease 33) (VHL-interacting deubiquitinating enzyme 1) (hVDU1)
Plate 1 crRNA 1	G05	CM-006082-01	USP34	9736	TCAATCCACTGAAGCATCGT	hg38|+chr2:61235888-61235910	GGG	NM_014709 (Exon57)	Q70CQ2	UBP34_HUMAN	Ubiquitin carboxyl-terminal hydrolase 34 (EC 3.4.19.12) (Deubiquitinating enzyme 34) (Ubiquitin thioesterase 34) (Ubiquitin-specific-processing protease 34)
Plate 1 crRNA 1	G06	CM-006083-01	USP35	57558	GGTGGTGACGTCGTCATACC	hg38|+chr11:78196266-78196288	CGG	NM_020798.2 (Exon2)	Q9P2H5	UBP35_HUMAN	Ubiquitin carboxyl-terminal hydrolase 35 (EC 3.4.19.12) (Deubiquitinating enzyme 35) (Ubiquitin thioesterase 35) (Ubiquitin-specific-processing protease 35)
Plate 1 crRNA 1	G07	CM-006084-01	USP36	57602	GCCCTTACCTGTGCCGAAGT	hg38|+chr17:78803377-78803399	GGG	NM_025090.3 (Exon16),NM_025090.3 (Exon16)	Q9P275	UBP36_HUMAN	Ubiquitin carboxyl-terminal hydrolase 36 (EC 3.4.19.12) (Deubiquitinating enzyme 36) (Ubiquitin thioesterase 36) (Ubiquitin-specific-processing protease 36)
Plate 1 crRNA 1	G08	CM-006085-01	USP37	57695	TCTCTATTGACCTTCCTCGT	hg38|-chr2:218488358-218488380	AGG	NM_020935.2 (Exon15)	Q86T82	UBP37_HUMAN	Ubiquitin carboxyl-terminal hydrolase 37 (EC 3.4.19.12) (Deubiquitinating enzyme 37) (Ubiquitin thioesterase 37) (Ubiquitin-specific-processing protease 37)
Plate 1 crRNA 1	G09	CM-006086-01	USP38	84640	ATCCTGGACTACATTCACAA	hg38|+chr4:143185757-143185779	CGG	NM_001290326.1 (Exon1),NM_001290325.1 (Exon1),NM_032557.6 (Exon1)	Q8NB14	UBP38_HUMAN	Ubiquitin carboxyl-terminal hydrolase 38 (EC 3.4.19.12) (Deubiquitinating enzyme 38) (HP43.8KD) (Ubiquitin thioesterase 38) (Ubiquitin-specific-processing protease 38)
Plate 1 crRNA 1	G10	CM-006087-01	USP39	10713	TTATTCAGTCCCACAATACC	hg38|-chr2:85625632-85625654	CGG	NM_001256725 (Exon5),NM_001256728 (Exon4),NM_001256727 (Exon5),NR_046347 (Exon5),NM_001256726 (Exon5),NM_006590 (Exon5)	Q53GS9	SNUT2_HUMAN	U4/U6.U5 tri-snRNP-associated protein 2 (Inactive ubiquitin-specific peptidase 39) (SAD1 homolog) (U4/U6.U5 tri-snRNP-associated 65 kDa protein) (65K)
Plate 1 crRNA 1	G11	CM-004974-01	USP4	7375	GCATCCTTCAGCTCCAAGTA	hg38|+chr3:49302403-49302425	GGG	NM_199443.2 (Exon9),NM_003363.3 (Exon10)	Q13107	UBP4_HUMAN	Ubiquitin carboxyl-terminal hydrolase 4 (EC 3.4.19.12) (Deubiquitinating enzyme 4) (Ubiquitin thioesterase 4) (Ubiquitin-specific-processing protease 4) (Ubiquitous nuclear protein homolog)
Plate 1 crRNA 1	H02	CM-006088-01	USP40	55230	TGTGAAATGCGAACGCTACA	hg38|-chr2:233551432-233551454	AGG	NM_018218 (Exon6)	Q9NVE5	UBP40_HUMAN	Ubiquitin carboxyl-terminal hydrolase 40 (EC 3.4.19.12) (Deubiquitinating enzyme 40) (Ubiquitin thioesterase 40) (Ubiquitin-specific-processing protease 40)
Plate 1 crRNA 1	H03	CM-006089-01	USP42	84132	GTTCCATGTCGAGTCCTAAC	hg38|+chr7:6149632-6149654	GGG	NM_032172.2 (Exon13)	Q9H9J4	UBP42_HUMAN	Ubiquitin carboxyl-terminal hydrolase 42 (EC 3.4.19.12) (Deubiquitinating enzyme 42) (Ubiquitin thioesterase 42) (Ubiquitin-specific-processing protease 42)
Plate 1 crRNA 1	H04	CM-023019-01	USP43	124739	TATGCCGTCTGCAACCACCA	hg38|+chr17:9701652-9701674	TGG	NM_153210 (Exon12),NM_001267576 (Exon12)	Q70EL4	UBP43_HUMAN	Ubiquitin carboxyl-terminal hydrolase 43 (EC 3.4.19.12) (Deubiquitinating enzyme 43) (Ubiquitin thioesterase 43) (Ubiquitin-specific-processing protease 43)
Plate 1 crRNA 1	H05	CM-006091-01	USP44	84101	TATCACTGCACAACTCGTAG	hg38|-chr12:95533907-95533929	TGG	NM_032147 (Exon2),NM_001278393 (Exon2),NM_001042403 (Exon2),NR_125360 (Exon1)	Q9H0E7	UBP44_HUMAN	Ubiquitin carboxyl-terminal hydrolase 44 (EC 3.4.19.12) (Deubiquitinating enzyme 44) (Ubiquitin thioesterase 44) (Ubiquitin-specific-processing protease 44)
Plate 1 crRNA 1	H06	CM-010054-01	USP45	85015	GGGTCCATCTGGCTGCACAC	hg38|+chr6:99446173-99446195	CGG	NM_001080481.1 (Exon14)	Q70EL2	UBP45_HUMAN	Ubiquitin carboxyl-terminal hydrolase 45 (EC 3.4.19.12) (Deubiquitinating enzyme 45) (Ubiquitin thioesterase 45) (Ubiquitin-specific-processing protease 45)
Plate 1 crRNA 1	H07	CM-006092-01	USP46	64854	TAATAAACCAGAACTCACCT	hg38|-chr4:52626077-52626099	GGG	NM_022832 (Exon4),NM_001134223 (Exon4),NM_001286768 (Exon5),NM_001286767 (Exon4)	P62068	UBP46_HUMAN	Ubiquitin carboxyl-terminal hydrolase 46 (EC 3.4.19.12) (Deubiquitinating enzyme 46) (Ubiquitin thioesterase 46) (Ubiquitin-specific-processing protease 46)
Plate 1 crRNA 1	H08	CM-006093-01	USP47	55031	AGCAGTAGAAATGGCTTATA	hg38|+chr11:11933914-11933936	AGG	NM_001282659.1 (Exon16),NM_017944.3 (Exon15)	Q96K76	UBP47_HUMAN	Ubiquitin carboxyl-terminal hydrolase 47 (EC 3.4.19.12) (Deubiquitinating enzyme 47) (Ubiquitin thioesterase 47) (Ubiquitin-specific-processing protease 47)
Plate 1 crRNA 1	H09	CM-006079-01	USP48	84196	AGACTGTGGATCTTTCACGT	hg38|+chr1:21736528-21736550	GGG	NM_032236.5 (Exon9),NM_001032730.1 (Exon9)	Q86UV5	UBP48_HUMAN	Ubiquitin carboxyl-terminal hydrolase 48 (EC 3.4.19.12) (Deubiquitinating enzyme 48) (Ubiquitin thioesterase 48) (Ubiquitin-specific peptidase 48) (Ubiquitin-specific protease 48) (Ubiquitin-specific-processing protease 48)
Plate 1 crRNA 1	H10	CM-005945-01	USP49	25862	TATTGCTACAACACAGAGGG	hg38|-chr6:41798723-41798745	AGG	NM_001286554 (Exon5),NM_018561 (Exon7)	Q70CQ1	UBP49_HUMAN	Ubiquitin carboxyl-terminal hydrolase 49 (EC 3.4.19.12) (Deubiquitinating enzyme 49) (Ubiquitin thioesterase 49) (Ubiquitin-specific-processing protease 49)
Plate 1 crRNA 1	H11	CM-006095-01	USP5	8078	TGCCCAGCTTGACAGCTAAC	hg38|-chr12:6856848-6856870	GGG	NM_001098536.1 (Exon6),NM_003481.2 (Exon6)	P45974	UBP5_HUMAN	Ubiquitin carboxyl-terminal hydrolase 5 (EC 3.4.19.12) (Deubiquitinating enzyme 5) (Isopeptidase T) (Ubiquitin thioesterase 5) (Ubiquitin-specific-processing protease 5)
Plate 1 crRNA 2	A02	CM-005791-02	BAP1	8314	GACCTCTCTTCCCAGAGGGT	hg38|-chr3:52403291-52403313	GGG	NM_004656.3 (Exon14),NM_004656.3 (Exon14)	Q92560	BAP1_HUMAN	Ubiquitin carboxyl-terminal hydrolase BAP1 (EC 3.4.19.12) (BRCA1-associated protein 1) (Cerebral protein 6)
Plate 1 crRNA 2	A03	CM-005814-02	COPS5	10987	GGCTGCTGCATATGAATACA	hg38|-chr8:67059237-67059259	TGG	NM_006837.2 (Exon2)	Q92905	CSN5_HUMAN	COP9 signalosome complex subunit 5 (SGN5) (Signalosome subunit 5) (EC 3.4.-.-) (Jun activation domain-binding protein 1)
Plate 1 crRNA 2	A04	CM-005798-02	BRCC3	79184	TCTAGTTGAACGATGATACA	hg38|+chrX:155072322-155072344	AGG	NM_001018055.2 (Exon2),NM_001242640.1 (Exon2),NM_024332.3 (Exon2),NM_001018055.2 (Exon2),NM_001242640.1 (Exon2),NM_024332.3 (Exon2)	P46736	BRCC3_HUMAN	Lys-63-specific deubiquitinase BRCC36 (EC 3.4.19.-) (BRCA1-A complex subunit BRCC36) (BRCA1/BRCA2-containing complex subunit 3) (BRCA1/BRCA2-containing complex subunit 36) (BRISC complex subunit BRCC36)
Plate 1 crRNA 2	A05	CM-004609-02	CYLD	1540	AAAGGCCTCCAAATAGACGT	hg38|+chr16:50750059-50750081	GGG	NM_015247.2 (Exon4),NM_001042355.1 (Exon3),NM_001042412.1 (Exon3)	Q9NQC7	CYLD_HUMAN	Ubiquitin carboxyl-terminal hydrolase CYLD (EC 3.4.19.12) (Deubiquitinating enzyme CYLD) (Ubiquitin thioesterase CYLD) (Ubiquitin-specific-processing protease CYLD)
Plate 1 crRNA 2	A06	CM-027332-02	USP17L2	377630	GACATGACCAGGACTGTGGA	hg38|+chr8:12138335-12138357	GGG	NM_201402 (Exon1)	Q6R6M4	U17L2_HUMAN	Ubiquitin carboxyl-terminal hydrolase 17 (USP17) (EC 3.4.19.12) (Deubiquitinating enzyme 17-like protein 2) (Deubiquitinating protein 3) (DUB-3) (Ubiquitin carboxyl-terminal hydrolase 17-like protein 2) (Ubiquitin thioesterase 17-like protein 2) (Ubiquitin-specific-processing protease 17-like protein 2)
Plate 1 crRNA 2	A07	CM-013606-02	FBXO7	25793	ACAGTCAGCTGATTGATACA	hg38|-chr22:32484033-32484055	AGG	NM_001257990 (Exon3),NM_012179 (Exon3),NM_001033024 (Exon3)	Q9Y3I1	FBX7_HUMAN	F-box only protein 7
Plate 1 crRNA 2	A08	CM-012435-02	FBXO8	26269	GTTCTTCACTAACCTCATCT	hg38|+chr4:174259686-174259708	GGG	NM_012180.2 (Exon3)	Q9NRD0	FBX8_HUMAN	F-box only protein 8 (F-box/SEC7 protein FBS)
Plate 1 crRNA 2	A09	CM-018630-02	MPND	84954	GGTGCTGTCCATCTACTACC	hg38|+chr19:4343973-4343995	TGG	NM_001159846 (Exon2),NM_032868 (Exon2),NM_001300862 (Exon2)	Q8N594	MPND_HUMAN	MPN domain-containing protein (EC 3.4.-.-)
Plate 1 crRNA 2	A10	CM-017674-02	JOSD1	9929	TTTGGAGTCGAGGTTGTAGT	hg38|+chr22:38688976-38688998	AGG	NM_014876.5 (Exon3)	Q15040	JOS1_HUMAN	Josephin-1 (EC 3.4.19.12) (Josephin domain-containing protein 1)
Plate 1 crRNA 2	A11	CM-005905-02	MYSM1	114803	CCTGTACTCAGACTGTTACA	hg38|+chr1:58667189-58667211	TGG	NM_001085487 (Exon16)	Q5VVJ2	MYSM1_HUMAN	Histone H2A deubiquitinase MYSM1 (2A-DUB) (EC 3.4.19.-) (Myb-like, SWIRM and MPN domain-containing protein 1)
Plate 1 crRNA 2	B02	CM-021061-02	OTUB1	55611	AGTAGGATGTGTCTCGAGTA	hg38|+chr11:63996707-63996729	GGG	NM_017670.2 (Exon4),NR_003089.1 (Exon4)	Q96FW1	OTUB1_HUMAN	Ubiquitin thioesterase OTUB1 (EC 3.4.19.12) (Deubiquitinating enzyme OTUB1) (OTU domain-containing ubiquitin aldehyde-binding protein 1) (Otubain-1) (hOTU1) (Ubiquitin-specific-processing protease OTUB1)
Plate 1 crRNA 2	B03	CM-010983-02	OTUB2	78990	GTTCCTGCGCCTGCTCACGT	hg38|+chr14:94044681-94044703	CGG	NM_023112.3 (Exon5)	Q96DC9	OTUB2_HUMAN	Ubiquitin thioesterase OTUB2 (EC 3.4.19.12) (Deubiquitinating enzyme OTUB2) (OTU domain-containing ubiquitin aldehyde-binding protein 2) (Otubain-2) (Ubiquitin-specific-processing protease OTUB2)
Plate 1 crRNA 2	B04	CM-026487-02	OTUD1	220213	GCCTCCCTCCAGTAGTTAAA	hg38|-chr10:23440633-23440655	TGG	NM_001145373 (Exon1)	Q5VV17	OTUD1_HUMAN	OTU domain-containing protein 1 (EC 3.4.19.12) (DUBA-7)
Plate 1 crRNA 2	B05	CM-009927-02	OTUD4	54726	TTACCTGTACATAAGAGAAA	hg38|+chr4:145165147-145165169	GGG	NM_001102653 (Exon4),NM_017493 (Exon3)	Q01804	OTUD4_HUMAN	OTU domain-containing protein 4 (EC 3.4.19.12) (HIV-1-induced protein HIN-1)
Plate 1 crRNA 2	B06	CM-013823-02	OTUD5	55593	ACTGGTACACCTCCACAGGA	hg38|+chrX:48934720-48934742	CGG	NM_001136159 (Exon4),NM_001136158 (Exon4),NM_001136157 (Exon4),NM_017602 (Exon4)	Q96G74	OTUD5_HUMAN	OTU domain-containing protein 5 (EC 3.4.19.12) (Deubiquitinating enzyme A) (DUBA)
Plate 1 crRNA 2	B07	CM-008553-02	OTUD6B	51633	TATTCTTCACCAACTATAAT	hg38|-chr8:91084068-91084090	GGG	NM_001286745 (Exon7),NM_016023 (Exon6)	Q8N6M0	OTU6B_HUMAN	Deubiquitinase OTUD6B (EC 3.4.19.12) (DUBA-5) (OTU domain-containing protein 6B)
Plate 1 crRNA 2	B08	CM-008841-02	OTUD7A	161725	CTGTTGGGAGGGACCTCCAA	hg38|+chr15:31501782-31501804	GGG	NM_130901 (Exon8)	Q8TE49	OTU7A_HUMAN	OTU domain-containing protein 7A (EC 3.4.19.12) (Zinc finger protein Cezanne 2)
Plate 1 crRNA 2	B09	CM-008670-02	OTUD7B	56957	GTGTCTGCCACGACGACTAT	hg38|+chr1:149950120-149950142	GGG	NM_020205 (Exon8)	Q6GQQ9	OTU7B_HUMAN	OTU domain-containing protein 7B (EC 3.4.19.12) (Cellular zinc finger anti-NF-kappa-B protein) (Cezanne) (Zinc finger A20 domain-containing protein 1) (Zinc finger protein Cezanne)
Plate 1 crRNA 2	B10	CM-016115-02	PARP11	57097	TCATGTGTTTGATTGTGCAG	hg38|+chr12:3821975-3821997	AGG	NM_020367.5 (Exon6),NR_104461.1 (Exon6),NM_001286522.1 (Exon6),NM_001286521.1 (Exon5)	Q9NR21	PAR11_HUMAN	Protein mono-ADP-ribosyltransferase PARP11 (EC 2.4.2.-) (ADP-ribosyltransferase diphtheria toxin-like 11) (ARTD11) (Poly [ADP-ribose] polymerase 11) (PARP-11)
Plate 1 crRNA 2	B11	CM-012252-02	PRPF8	10594	CCGTTCACGTAACACATACA	hg38|+chr17:1658664-1658686	GGG	NM_006445 (Exon33)	Q6P2Q9	PRP8_HUMAN	Pre-mRNA-processing-splicing factor 8 (220 kDa U5 snRNP-specific protein) (PRP8 homolog) (Splicing factor Prp8) (p220)
Plate 1 crRNA 2	C02	CM-006024-02	PSMD14	10213	GGTTGGTATCACAGTCACCC	hg38|+chr2:161371188-161371210	TGG	NM_005805.5 (Exon7)	O00487	PSDE_HUMAN	26S proteasome non-ATPase regulatory subunit 14 (EC 3.4.19.-) (26S proteasome regulatory subunit RPN11) (26S proteasome-associated PAD1 homolog 1)
Plate 1 crRNA 2	C03	CM-015500-02	JOSD2	126119	CTGCCGTTCGTGGTACACGG	hg38|+chr19:50510375-50510397	TGG	NM_138334.3 (Exon2),NM_001270686.1 (Exon2),NM_001270641.1 (Exon2),NM_001270639.1 (Exon2),NM_001270640.1 (Exon2)	Q8TAC2	JOS2_HUMAN	Josephin-2 (EC 3.4.19.12) (Josephin domain-containing protein 2)
Plate 1 crRNA 2	C04	CM-006033-02	SENP2	59343	TACAATGCTGCCAGCTTATT	hg38|+chr3:185598444-185598466	TGG	NM_021627.2 (Exon3)	Q9HC62	SENP2_HUMAN	Sentrin-specific protease 2 (EC 3.4.22.-) (Axam2) (SMT3-specific isopeptidase 2) (Smt3ip2) (Sentrin/SUMO-specific protease SENP2)
Plate 1 crRNA 2	C05	CM-012202-02	STAMBP	10617	ATGGATGAGACTGTTAAGGT	hg38|-chr2:73847636-73847658	GGG	NM_006463.4 (Exon6),NM_201647.2 (Exon5),NM_213622.2 (Exon5)	O95630	STABP_HUMAN	STAM-binding protein (EC 3.4.19.-) (Associated molecule with the SH3 domain of STAM) (Endosome-associated ubiquitin isopeptidase)
Plate 1 crRNA 2	C06	CM-005783-02	STAMBPL1	57559	CTGCTTTGGCACAATTACAT	hg38|-chr10:88916702-88916724	GGG	NM_020799.3 (Exon8)	Q96FJ0	STALP_HUMAN	AMSH-like protease (AMSH-LP) (EC 3.4.19.-) (STAM-binding protein-like 1)
Plate 1 crRNA 2	C07	CM-009919-02	TNFAIP3	7128	GTTCCACGCCAAGGGCTCAT	hg38|-chr6:137878770-137878792	AGG	NM_001270508.1 (Exon7),NM_001270507.1 (Exon7),NM_006290.3 (Exon7)	P21580	TNAP3_HUMAN	Tumor necrosis factor alpha-induced protein 3 (TNF alpha-induced protein 3) (EC 2.3.2.-) (EC 3.4.19.12) (OTU domain-containing protein 7C) (Putative DNA-binding protein A20) (Zinc finger protein A20) [Cleaved into: A20p50; A20p37]
Plate 1 crRNA 2	C08	CM-012786-02	UBL3	5412	ATGTCAGAAGCAGAATCGTT	hg38|+chr13:29777187-29777209	AGG	NM_007106.3 (Exon2)	O95164	UBL3_HUMAN	Ubiquitin-like protein 3 (Membrane-anchored ubiquitin-fold protein) (HsMUB) (MUB) (Protein HCG-1)
Plate 1 crRNA 2	C09	CM-020658-02	UBL4A	8266	CTTGGCCCGCCACTTCAGTG	hg38|-chrX:154485806-154485828	CGG	NM_014235.4 (Exon3)	P11441	UBL4A_HUMAN	Ubiquitin-like protein 4A (Ubiquitin-like protein GDX)
Plate 1 crRNA 2	C10	CM-014320-02	UBL5	59286	GTGGATACTTGCATTTAACG	hg38|-chr19:9828379-9828401	CGG	NM_024292.3 (Exon2),NM_001048241.2 (Exon2),NM_024292.3 (Exon2),NM_001048241.2 (Exon2)	Q9BZL1	UBL5_HUMAN	Ubiquitin-like protein 5
Plate 1 crRNA 2	C11	CM-010691-02	UBR1	197131	AATGGCAGTGGTATGCAACT	hg38|+chr15:43067907-43067929	GGG	NM_174916 (Exon6)	Q8IWV7	UBR1_HUMAN	E3 ubiquitin-protein ligase UBR1 (EC 2.3.2.27) (N-recognin-1) (RING-type E3 ubiquitin transferase UBR1) (Ubiquitin-protein ligase E3-alpha-1) (Ubiquitin-protein ligase E3-alpha-I)
Plate 1 crRNA 2	D02	CM-018385-02	UBTD1	80019	AGCATAGGCGGCAGCCTTGA	hg38|-chr10:97568052-97568074	GGG	NM_024954.4 (Exon2)	Q9HAC8	UBTD1_HUMAN	Ubiquitin domain-containing protein 1
Plate 1 crRNA 2	D03	CM-016592-02	UBTD2	92181	ACATAACATTACCACATGGT	hg38|-chr5:172234117-172234139	AGG	NM_152277 (Exon2)	Q8WUN7	UBTD2_HUMAN	Ubiquitin domain-containing protein 2 (Dendritic cell-derived ubiquitin-like protein) (DC-UbP) (Ubiquitin-like protein SB72)
Plate 1 crRNA 2	D04	CM-004309-02	UCHL1	7345	GGTGAATTCTCTGCAGACCT	hg38|-chr4:41267994-41268016	TGG	NM_004181.4 (Exon9)	P09936	UCHL1_HUMAN	Ubiquitin carboxyl-terminal hydrolase isozyme L1 (UCH-L1) (EC 3.4.19.12) (Neuron cytoplasmic protein 9.5) (PGP 9.5) (PGP9.5) (Ubiquitin thioesterase L1)
Plate 1 crRNA 2	D05	CM-006059-02	UCHL3	7347	GGTCTCATGAGTAACTCGGA	hg38|-chr13:75569461-75569483	TGG	NM_006002.4 (Exon6),NM_001270952.1 (Exon6)	P15374	UCHL3_HUMAN	Ubiquitin carboxyl-terminal hydrolase isozyme L3 (UCH-L3) (EC 3.4.19.12) (Ubiquitin thioesterase L3)
Plate 1 crRNA 2	D06	CM-006060-02	UCHL5	51377	GTTCAGTAACACACTCACTA	hg38|+chr1:193029607-193029629	TGG	NM_015984.3 (Exon4),NM_001199263.1 (Exon4),NM_001199262.1 (Exon4),NM_001199261.1 (Exon4),NR_037607.1 (Exon4)	Q9Y5K5	UCHL5_HUMAN	Ubiquitin carboxyl-terminal hydrolase isozyme L5 (UCH-L5) (EC 3.4.19.12) (Ubiquitin C-terminal hydrolase UCH37) (Ubiquitin thioesterase L5)
Plate 1 crRNA 2	D07	CM-005077-02	UCK2	7371	GAACAGCTAGCGGCAAGGTA	hg38|+chr1:165827916-165827938	CGG	NM_012474.4 (Exon1)	Q9BZX2	UCK2_HUMAN	Uridine-cytidine kinase 2 (UCK 2) (EC 2.7.1.48) (Cytidine monophosphokinase 2) (Testis-specific protein TSA903) (Uridine monophosphokinase 2)
Plate 1 crRNA 2	D08	CM-008494-02	UEVLD	55293	CACATTAGCAATTTCAGCAA	hg38|-chr11:18564891-18564913	AGG	NM_001261386 (Exon4),NM_001297771 (Exon6),NM_001261385 (Exon6),NM_001261384 (Exon4),NM_001261383 (Exon5),NM_018314 (Exon6),NM_001261382 (Exon5),NM_001040697 (Exon6)	Q8IX04	UEVLD_HUMAN	Ubiquitin-conjugating enzyme E2 variant 3 (UEV-3) (EV and lactate/malate dehydrogenase domain-containing protein)
Plate 1 crRNA 2	D09	CM-017918-02	UFD1L	7353	CATGCGGTCCGAATTCTTAT	hg38|+chr22:19471747-19471769	TGG	NM_005659 (Exon4),NM_001035247 (Exon4)	Q92890	UFD1_HUMAN	Ubiquitin recognition factor in ER-associated degradation protein 1 (Ubiquitin fusion degradation protein 1) (UB fusion protein 1)
Plate 1 crRNA 2	D10	CM-006061-02	USP1	7398	GTGGCATTACAATTAGTAGT	hg38|+chr1:62450377-62450399	GGG	NM_003368.4 (Exon9),NM_001017416.1 (Exon9),NM_001017415.1 (Exon9)	O94782	UBP1_HUMAN	Ubiquitin carboxyl-terminal hydrolase 1 (EC 3.4.19.12) (Deubiquitinating enzyme 1) (hUBP) (Ubiquitin thioesterase 1) (Ubiquitin-specific-processing protease 1)
Plate 1 crRNA 2	D11	CM-006062-02	USP10	9100	ATTGGCATGGCCATTGACCA	hg38|-chr16:84745005-84745027	GGG	NR_073578.1 (Exon3),NM_001272075.1 (Exon5),NM_005153.2 (Exon4)	Q14694	UBP10_HUMAN	Ubiquitin carboxyl-terminal hydrolase 10 (EC 3.4.19.12) (Deubiquitinating enzyme 10) (Ubiquitin thioesterase 10) (Ubiquitin-specific-processing protease 10)
Plate 1 crRNA 2	E02	CM-006063-02	USP11	8237	GCTGGGCGACCGGATCAGGT	hg38|+chrX:47241682-47241704	AGG	NM_004651 (Exon9)	P51784	UBP11_HUMAN	Ubiquitin carboxyl-terminal hydrolase 11 (EC 3.4.19.12) (Deubiquitinating enzyme 11) (Ubiquitin thioesterase 11) (Ubiquitin-specific-processing protease 11)
Plate 1 crRNA 2	E03	CM-027148-02	USP12	219333	TTGCGTATAAGAGTCAACCT	hg38|-chr13:27105849-27105871	AGG	NM_182488.3 (Exon3),NM_182488.3 (Exon3)	O75317	UBP12_HUMAN	Ubiquitin carboxyl-terminal hydrolase 12 (EC 3.4.19.12) (Deubiquitinating enzyme 12) (Ubiquitin thioesterase 12) (Ubiquitin-hydrolyzing enzyme 1) (Ubiquitin-specific-processing protease 12)
Plate 1 crRNA 2	E04	CM-006064-02	USP13	8975	ATGTATGGTCCTGGCTACAC	hg38|+chr3:179721489-179721511	GGG	NM_003940 (Exon8)	Q92995	UBP13_HUMAN	Ubiquitin carboxyl-terminal hydrolase 13 (EC 3.4.19.12) (Deubiquitinating enzyme 13) (Isopeptidase T-3) (ISOT-3) (Ubiquitin thioesterase 13) (Ubiquitin-specific-processing protease 13)
Plate 1 crRNA 2	E05	CM-006065-02	USP14	9097	TTTGCCGAGAAAGGTGAACA	hg38|+chr18:196729-196751	AGG	NM_005151.3 (Exon7),NM_001037334.1 (Exon6)	P54578	UBP14_HUMAN	Ubiquitin carboxyl-terminal hydrolase 14 (EC 3.4.19.12) (Deubiquitinating enzyme 14) (Ubiquitin thioesterase 14) (Ubiquitin-specific-processing protease 14)
Plate 1 crRNA 2	E06	CM-006066-02	USP15	9958	AGTTGGGACAAATACCAGAT	hg38|+chr12:62294234-62294256	GGG	NM_006313 (Exon2),NM_001252078 (Exon2),NM_001252079 (Exon2)	Q9Y4E8	UBP15_HUMAN	Ubiquitin carboxyl-terminal hydrolase 15 (EC 3.4.19.12) (Deubiquitinating enzyme 15) (Ubiquitin thioesterase 15) (Ubiquitin-specific-processing protease 15) (Unph-2) (Unph4)
Plate 1 crRNA 2	E07	CM-006067-02	USP16	10600	CATGGGAAAGAAACGGACAA	hg38|+chr21:29027913-29027935	AGG	NM_006447.2 (Exon2),NM_001032410.1 (Exon3),NM_001001992.1 (Exon2)	Q9Y5T5	UBP16_HUMAN	Ubiquitin carboxyl-terminal hydrolase 16 (EC 3.4.19.12) (Deubiquitinating enzyme 16) (Ubiquitin thioesterase 16) (Ubiquitin-processing protease UBP-M) (Ubiquitin-specific-processing protease 16)
Plate 1 crRNA 2	E08	CM-004236-02	USP18	11274	AAATCAAGGAGTCCTTCACC	hg38|-chr22:18167919-18167941	CGG	NM_017414.3 (Exon6)	Q9UMW8	UBP18_HUMAN	Ubl carboxyl-terminal hydrolase 18 (EC 3.4.19.-) (43 kDa ISG15-specific protease) (hUBP43) (ISG15-specific-processing protease) (Ubl thioesterase 18)
Plate 1 crRNA 2	E09	CM-006068-02	USP19	10869	TTGGCAGGTGAAGCTCAGGT	hg38|-chr3:49116275-49116297	GGG	NM_001199160 (Exon9),NM_001199162 (Exon9),NM_001199161 (Exon9),NM_006677 (Exon8),NM_006677.2 (Exon8),NM_001199160.1 (Exon9),NM_001199162.1 (Exon9),NM_001199161.1 (Exon9)	O94966	UBP19_HUMAN	Ubiquitin carboxyl-terminal hydrolase 19 (EC 3.4.19.12) (Deubiquitinating enzyme 19) (Ubiquitin thioesterase 19) (Ubiquitin-specific-processing protease 19) (Zinc finger MYND domain-containing protein 9)
Plate 1 crRNA 2	E10	CM-006069-02	USP2	9099	GGGCCTCTCACCTTCCACGA	hg38|+chr11:119359526-119359548	GGG	NM_171997 (Exon3),NM_004205 (Exon4),NM_001243759 (Exon3)	O75604	UBP2_HUMAN	Ubiquitin carboxyl-terminal hydrolase 2 (EC 3.4.19.12) (41 kDa ubiquitin-specific protease) (Deubiquitinating enzyme 2) (Ubiquitin thioesterase 2) (Ubiquitin-specific-processing protease 2)
Plate 1 crRNA 2	E11	CM-006070-02	USP20	10868	TTTGCCGCTGATGAGTTAAA	hg38|+chr9:129870526-129870548	GGG	NM_006676.7 (Exon15),NM_001110303.3 (Exon15),NM_001008563.4 (Exon15),NM_006676.7 (Exon15),NM_001110303.3 (Exon15),NM_001008563.4 (Exon15)	Q9Y2K6	UBP20_HUMAN	Ubiquitin carboxyl-terminal hydrolase 20 (EC 3.4.19.12) (Deubiquitinating enzyme 20) (Ubiquitin thioesterase 20) (Ubiquitin-specific-processing protease 20) (VHL-interacting deubiquitinating enzyme 2) (hVDU2)
Plate 1 crRNA 2	F02	CM-006071-02	USP21	27005	CTCTGTCCGTATGCTGAACA	hg38|-chr1:161161143-161161165	GGG	NM_012475.4 (Exon2),NM_001014443.2 (Exon3)	Q9UK80	UBP21_HUMAN	Ubiquitin carboxyl-terminal hydrolase 21 (EC 3.4.19.12) (Deubiquitinating enzyme 21) (Ubiquitin thioesterase 21) (Ubiquitin-specific-processing protease 21)
Plate 1 crRNA 2	F03	CM-006072-02	USP22	23326	TTGTGGACTCCTGGTAGCTA	hg38|+chr17:21007920-21007942	TGG	NM_015276 (Exon9)	Q9UPT9	UBP22_HUMAN	Ubiquitin carboxyl-terminal hydrolase 22 (EC 3.4.19.12) (Deubiquitinating enzyme 22) (Ubiquitin thioesterase 22) (Ubiquitin-specific-processing protease 22)
Plate 1 crRNA 2	F04	CM-006073-02	USP24	23358	CTTGAGGGAGCAATGCTAAT	hg38|+chr1:55079611-55079633	GGG	NM_015306 (Exon60)	Q9UPU5	UBP24_HUMAN	Ubiquitin carboxyl-terminal hydrolase 24 (EC 3.4.19.12) (Deubiquitinating enzyme 24) (Ubiquitin thioesterase 24) (Ubiquitin-specific-processing protease 24)
Plate 1 crRNA 2	F05	CM-006074-02	USP25	29761	GAGTTTGGCCGAATCAAACA	hg38|+chr21:15777959-15777981	GGG	NM_001283042.1 (Exon4),NM_001283041.1 (Exon4),NM_013396.4 (Exon4)	Q9UHP3	UBP25_HUMAN	Ubiquitin carboxyl-terminal hydrolase 25 (EC 3.4.19.12) (Deubiquitinating enzyme 25) (USP on chromosome 21) (Ubiquitin thioesterase 25) (Ubiquitin-specific-processing protease 25)
Plate 1 crRNA 2	F06	CM-006075-02	USP26	83844	TATTGGAACCCAGTGCAAGT	hg38|+chrX:133025838-133025860	AGG	NM_031907 (Exon1)	Q9BXU7	UBP26_HUMAN	Ubiquitin carboxyl-terminal hydrolase 26 (EC 3.4.19.12) (Deubiquitinating enzyme 26) (Ubiquitin thioesterase 26) (Ubiquitin-specific-processing protease 26)
Plate 1 crRNA 2	F07	CM-031532-02	USP27X	389856	TTTACGAGGCCAGAGCACTT	hg38|+chrX:49881115-49881137	AGG	NM_001145073.2 (Exon1)	A6NNY8	UBP27_HUMAN	Ubiquitin carboxyl-terminal hydrolase 27 (EC 3.4.19.12) (Deubiquitinating enzyme 27) (Ubiquitin carboxyl-terminal hydrolase 22-like) (Ubiquitin thioesterase 27) (Ubiquitin-specific-processing protease 27) (X-linked ubiquitin carboxyl-terminal hydrolase 27)
Plate 1 crRNA 2	F08	CM-006076-02	USP28	57646	GATGTCAGTGGTTTAGACTT	hg38|+chr11:113815296-113815318	GGG	NM_001301029 (Exon12),NM_020886 (Exon14)	Q96RU2	UBP28_HUMAN	Ubiquitin carboxyl-terminal hydrolase 28 (EC 3.4.19.12) (Deubiquitinating enzyme 28) (Ubiquitin thioesterase 28) (Ubiquitin-specific-processing protease 28)
Plate 1 crRNA 2	F09	CM-006077-02	USP29	57663	TTGCAAGGCATACATTTAGT	hg38|+chr19:57130159-57130181	AGG	NM_020903.2 (Exon4)	Q9HBJ7	UBP29_HUMAN	Ubiquitin carboxyl-terminal hydrolase 29 (EC 3.4.19.12) (Deubiquitinating enzyme 29) (Ubiquitin thioesterase 29) (Ubiquitin-specific-processing protease 29)
Plate 1 crRNA 2	F10	CM-006078-02	USP3	9960	ACTGTTGTCACGGCTATATT	hg38|+chr15:63574059-63574081	CGG	NM_006537.3 (Exon10),NM_001256702.1 (Exon9),NR_046341.1 (Exon11),NR_046342.1 (Exon11)	Q9Y6I4	UBP3_HUMAN	Ubiquitin carboxyl-terminal hydrolase 3 (EC 3.4.19.12) (Deubiquitinating enzyme 3) (Ubiquitin thioesterase 3) (Ubiquitin-specific-processing protease 3)
Plate 1 crRNA 2	F11	CM-021294-02	USP30	84749	CCAATGACGAGGTAATGACA	hg38|-chr12:109071629-109071651	TGG	NM_001301175 (Exon8),NM_032663 (Exon5)	Q70CQ3	UBP30_HUMAN	Ubiquitin carboxyl-terminal hydrolase 30 (EC 3.4.19.12) (Deubiquitinating enzyme 30) (Ubiquitin thioesterase 30) (Ubiquitin-specific-processing protease 30) (Ub-specific protease 30)
Plate 1 crRNA 2	G02	CM-022513-02	USP31	57478	TCTACTATTGGGTGGCACAA	hg38|+chr16:23087095-23087117	GGG	NM_020718.3 (Exon9)	Q70CQ4	UBP31_HUMAN	Ubiquitin carboxyl-terminal hydrolase 31 (EC 3.4.19.12) (Deubiquitinating enzyme 31) (Ubiquitin thioesterase 31) (Ubiquitin-specific-processing protease 31)
Plate 1 crRNA 2	G03	CM-006080-02	USP32	84669	ATCCCAATCCACAGCGATAT	hg38|+chr17:60190605-60190627	AGG	NM_032582 (Exon29),NM_032582.3 (Exon29)	Q8NFA0	UBP32_HUMAN	Ubiquitin carboxyl-terminal hydrolase 32 (EC 3.4.19.12) (Deubiquitinating enzyme 32) (Renal carcinoma antigen NY-REN-60) (Ubiquitin thioesterase 32) (Ubiquitin-specific-processing protease 32)
Plate 1 crRNA 2	G04	CM-006081-02	USP33	23032	CATAACCACTGAGGAGACAA	hg38|-chr1:77728601-77728623	TGG	NM_201626.2 (Exon11),NM_201624.2 (Exon10),NM_015017.4 (Exon11)	Q8TEY7	UBP33_HUMAN	Ubiquitin carboxyl-terminal hydrolase 33 (EC 3.4.19.12) (Deubiquitinating enzyme 33) (Ubiquitin thioesterase 33) (Ubiquitin-specific-processing protease 33) (VHL-interacting deubiquitinating enzyme 1) (hVDU1)
Plate 1 crRNA 2	G05	CM-006082-02	USP34	9736	GCGTCATGTCCAAACGTAAT	hg38|+chr2:61248556-61248578	GGG	NM_014709 (Exon49)	Q70CQ2	UBP34_HUMAN	Ubiquitin carboxyl-terminal hydrolase 34 (EC 3.4.19.12) (Deubiquitinating enzyme 34) (Ubiquitin thioesterase 34) (Ubiquitin-specific-processing protease 34)
Plate 1 crRNA 2	G06	CM-006083-02	USP35	57558	GCGAACAGCTCTTTGAGGCA	hg38|-chr11:78196879-78196901	GGG	NM_020798.2 (Exon2)	Q9P2H5	UBP35_HUMAN	Ubiquitin carboxyl-terminal hydrolase 35 (EC 3.4.19.12) (Deubiquitinating enzyme 35) (Ubiquitin thioesterase 35) (Ubiquitin-specific-processing protease 35)
Plate 1 crRNA 2	G07	CM-006084-02	USP36	57602	TCTGGATCACCATCACCCAT	hg38|+chr17:78802506-78802528	GGG	NM_025090.3 (Exon17),NM_025090.3 (Exon17)	Q9P275	UBP36_HUMAN	Ubiquitin carboxyl-terminal hydrolase 36 (EC 3.4.19.12) (Deubiquitinating enzyme 36) (Ubiquitin thioesterase 36) (Ubiquitin-specific-processing protease 36)
Plate 1 crRNA 2	G08	CM-006085-02	USP37	57695	CTGATGAGCCGGTACGAATG	hg38|+chr2:218457127-218457149	AGG	NM_020935.2 (Exon24)	Q86T82	UBP37_HUMAN	Ubiquitin carboxyl-terminal hydrolase 37 (EC 3.4.19.12) (Deubiquitinating enzyme 37) (Ubiquitin thioesterase 37) (Ubiquitin-specific-processing protease 37)
Plate 1 crRNA 2	G09	CM-006086-02	USP38	84640	GGCTCAGCATGTGGATACAT	hg38|+chr4:143195743-143195765	GGG	NM_001290326.1 (Exon3),NM_001290325.1 (Exon3),NM_032557.6 (Exon3)	Q8NB14	UBP38_HUMAN	Ubiquitin carboxyl-terminal hydrolase 38 (EC 3.4.19.12) (Deubiquitinating enzyme 38) (HP43.8KD) (Ubiquitin thioesterase 38) (Ubiquitin-specific-processing protease 38)
Plate 1 crRNA 2	G10	CM-006087-02	USP39	10713	CATGTGCCTTGAAATTTCGA	hg38|-chr2:85630855-85630877	GGG	NM_001256725 (Exon6),NM_001256728 (Exon5),NM_001256727 (Exon6),NR_046347 (Exon6),NM_001256726 (Exon6),NM_006590 (Exon6)	Q53GS9	SNUT2_HUMAN	U4/U6.U5 tri-snRNP-associated protein 2 (Inactive ubiquitin-specific peptidase 39) (SAD1 homolog) (U4/U6.U5 tri-snRNP-associated 65 kDa protein) (65K)
Plate 1 crRNA 2	G11	CM-004974-02	USP4	7375	CCAGGTTGTATATGAGAGGA	hg38|+chr3:49310675-49310697	TGG	NM_199443.2 (Exon7),NM_003363.3 (Exon8)	Q13107	UBP4_HUMAN	Ubiquitin carboxyl-terminal hydrolase 4 (EC 3.4.19.12) (Deubiquitinating enzyme 4) (Ubiquitin thioesterase 4) (Ubiquitin-specific-processing protease 4) (Ubiquitous nuclear protein homolog)
Plate 1 crRNA 2	H02	CM-006088-02	USP40	55230	GGGCATAGGTCCTCTCACCA	hg38|+chr2:233485919-233485941	GGG	NM_018218 (Exon28)	Q9NVE5	UBP40_HUMAN	Ubiquitin carboxyl-terminal hydrolase 40 (EC 3.4.19.12) (Deubiquitinating enzyme 40) (Ubiquitin thioesterase 40) (Ubiquitin-specific-processing protease 40)
Plate 1 crRNA 2	H03	CM-006089-02	USP42	84132	TTGGATTTGCCATTCATCAC	hg38|-chr7:6149967-6149989	GGG	NM_032172.2 (Exon13)	Q9H9J4	UBP42_HUMAN	Ubiquitin carboxyl-terminal hydrolase 42 (EC 3.4.19.12) (Deubiquitinating enzyme 42) (Ubiquitin thioesterase 42) (Ubiquitin-specific-processing protease 42)
Plate 1 crRNA 2	H04	CM-023019-02	USP43	124739	GCTCAGCCCGCCACTCACCA	hg38|-chr17:9728689-9728711	GGG	NM_153210 (Exon15),NM_001267576 (Exon15)	Q70EL4	UBP43_HUMAN	Ubiquitin carboxyl-terminal hydrolase 43 (EC 3.4.19.12) (Deubiquitinating enzyme 43) (Ubiquitin thioesterase 43) (Ubiquitin-specific-processing protease 43)
Plate 1 crRNA 2	H05	CM-006091-02	USP44	84101	GTGACTCCTCAGTTAAACGA	hg38|-chr12:95533462-95533484	AGG	NM_032147 (Exon2),NM_001278393 (Exon2),NM_001042403 (Exon2),NR_125360 (Exon1)	Q9H0E7	UBP44_HUMAN	Ubiquitin carboxyl-terminal hydrolase 44 (EC 3.4.19.12) (Deubiquitinating enzyme 44) (Ubiquitin thioesterase 44) (Ubiquitin-specific-processing protease 44)
Plate 1 crRNA 2	H06	CM-010054-02	USP45	85015	CTTACCCTTTCTTCTATTAT	hg38|+chr6:99465075-99465097	AGG	NM_001080481.1 (Exon12)	Q70EL2	UBP45_HUMAN	Ubiquitin carboxyl-terminal hydrolase 45 (EC 3.4.19.12) (Deubiquitinating enzyme 45) (Ubiquitin thioesterase 45) (Ubiquitin-specific-processing protease 45)
Plate 1 crRNA 2	H07	CM-006092-02	USP46	64854	GGAGAATGTGTTGGCATACA	hg38|-chr4:52628079-52628101	AGG	NM_022832 (Exon3),NM_001134223 (Exon3),NM_001286768 (Exon4),NM_001286767 (Exon3)	P62068	UBP46_HUMAN	Ubiquitin carboxyl-terminal hydrolase 46 (EC 3.4.19.12) (Deubiquitinating enzyme 46) (Ubiquitin thioesterase 46) (Ubiquitin-specific-processing protease 46)
Plate 1 crRNA 2	H08	CM-006093-02	USP47	55031	TTGAAACCACAGATGTTACA	hg38|+chr11:11902813-11902835	AGG	NM_001282659.1 (Exon6),NM_017944.3 (Exon5)	Q96K76	UBP47_HUMAN	Ubiquitin carboxyl-terminal hydrolase 47 (EC 3.4.19.12) (Deubiquitinating enzyme 47) (Ubiquitin thioesterase 47) (Ubiquitin-specific-processing protease 47)
Plate 1 crRNA 2	H09	CM-006079-02	USP48	84196	TATTATAGTTGCAACCAGTG	hg38|-chr1:21751601-21751623	TGG	NM_032236.5 (Exon6),NM_001032730.1 (Exon6)	Q86UV5	UBP48_HUMAN	Ubiquitin carboxyl-terminal hydrolase 48 (EC 3.4.19.12) (Deubiquitinating enzyme 48) (Ubiquitin thioesterase 48) (Ubiquitin-specific peptidase 48) (Ubiquitin-specific protease 48) (Ubiquitin-specific-processing protease 48)
Plate 1 crRNA 2	H10	CM-005945-02	USP49	25862	CATCCCATGGATTACCTAGA	hg38|-chr6:41798621-41798643	GGG	NM_018561 (Exon7)	Q70CQ1	UBP49_HUMAN	Ubiquitin carboxyl-terminal hydrolase 49 (EC 3.4.19.12) (Deubiquitinating enzyme 49) (Ubiquitin thioesterase 49) (Ubiquitin-specific-processing protease 49)
Plate 1 crRNA 2	H11	CM-006095-02	USP5	8078	GGAGTATTCCAAGCCAGTAC	hg38|+chr12:6860181-6860203	CGG	NM_001098536.1 (Exon10),NM_003481.2 (Exon10)	P45974	UBP5_HUMAN	Ubiquitin carboxyl-terminal hydrolase 5 (EC 3.4.19.12) (Deubiquitinating enzyme 5) (Isopeptidase T) (Ubiquitin thioesterase 5) (Ubiquitin-specific-processing protease 5)
Plate 1 crRNA 3	A02	CM-005791-03	BAP1	8314	GATGTTCTGCTCCACTAGGT	hg38|+chr3:52402390-52402412	TGG	NM_004656.3 (Exon17),NM_004656.3 (Exon17)	Q92560	BAP1_HUMAN	Ubiquitin carboxyl-terminal hydrolase BAP1 (EC 3.4.19.12) (BRCA1-associated protein 1) (Cerebral protein 6)
Plate 1 crRNA 3	A03	CM-005814-03	COPS5	10987	GTGATGCATGCCAGATCGGG	hg38|-chr8:67059371-67059393	AGG	NM_006837.2 (Exon2)	Q92905	CSN5_HUMAN	COP9 signalosome complex subunit 5 (SGN5) (Signalosome subunit 5) (EC 3.4.-.-) (Jun activation domain-binding protein 1)
Plate 1 crRNA 3	A04	CM-005798-03	BRCC3	79184	ATGAATGTGAACAATTCTGA	hg38|-chrX:155077177-155077199	CGG	NM_001018055.2 (Exon4),NM_001242640.1 (Exon4),NM_024332.3 (Exon4)	P46736	BRCC3_HUMAN	Lys-63-specific deubiquitinase BRCC36 (EC 3.4.19.-) (BRCA1-A complex subunit BRCC36) (BRCA1/BRCA2-containing complex subunit 3) (BRCA1/BRCA2-containing complex subunit 36) (BRISC complex subunit BRCC36)
Plate 1 crRNA 3	A05	CM-004609-03	CYLD	1540	GGATAACCCTATTGGCAACT	hg38|+chr16:50754318-50754340	GGG	NM_015247.2 (Exon6),NM_001042355.1 (Exon5),NM_001042412.1 (Exon5)	Q9NQC7	CYLD_HUMAN	Ubiquitin carboxyl-terminal hydrolase CYLD (EC 3.4.19.12) (Deubiquitinating enzyme CYLD) (Ubiquitin thioesterase CYLD) (Ubiquitin-specific-processing protease CYLD)
Plate 1 crRNA 3	A06	CM-027332-03	USP17L2	377630	CCTCCCTTGCAGAGAAGCGA	hg38|+chr8:12137228-12137250	GGG	NM_201402 (Exon1),NM_201402.2 (Exon1)	Q6R6M4	U17L2_HUMAN	Ubiquitin carboxyl-terminal hydrolase 17 (USP17) (EC 3.4.19.12) (Deubiquitinating enzyme 17-like protein 2) (Deubiquitinating protein 3) (DUB-3) (Ubiquitin carboxyl-terminal hydrolase 17-like protein 2) (Ubiquitin thioesterase 17-like protein 2) (Ubiquitin-specific-processing protease 17-like protein 2)
Plate 1 crRNA 3	A07	CM-013606-03	FBXO7	25793	CTGATTGGGTCTCCAACATA	hg38|-chr22:32498324-32498346	GGG	NM_001257990 (Exon9),NM_012179 (Exon9),NM_001033024 (Exon9)	Q9Y3I1	FBX7_HUMAN	F-box only protein 7
Plate 1 crRNA 3	A08	CM-012435-03	FBXO8	26269	TACAATAAGAACCCACCTTT	hg38|-chr4:174259769-174259791	AGG	NM_012180.2 (Exon3)	Q9NRD0	FBX8_HUMAN	F-box only protein 8 (F-box/SEC7 protein FBS)
Plate 1 crRNA 3	A09	CM-018630-03	MPND	84954	GTGATGCCTCCTCCCGAGGT	hg38|+chr19:4357568-4357590	AGG	NM_001159846 (Exon8),NM_032868 (Exon10),NM_001300862 (Exon10)	Q8N594	MPND_HUMAN	MPN domain-containing protein (EC 3.4.-.-)
Plate 1 crRNA 3	A10	CM-017674-03	JOSD1	9929	TAGGTTGTCTCCAAACACCA	hg38|-chr22:38689405-38689427	TGG	NM_014876.5 (Exon2)	Q15040	JOS1_HUMAN	Josephin-1 (EC 3.4.19.12) (Josephin domain-containing protein 1)
Plate 1 crRNA 3	A11	CM-005905-03	MYSM1	114803	TAATCTCATCGCAGCGTACA	hg38|-chr1:58673642-58673664	AGG	NM_001085487 (Exon11)	Q5VVJ2	MYSM1_HUMAN	Histone H2A deubiquitinase MYSM1 (2A-DUB) (EC 3.4.19.-) (Myb-like, SWIRM and MPN domain-containing protein 1)
Plate 1 crRNA 3	B02	CM-021061-03	OTUB1	55611	AGCCATGATGGCTTCATCAT	hg38|-chr11:63988352-63988374	AGG	NM_017670.2 (Exon2),NR_003089.1 (Exon2)	Q96FW1	OTUB1_HUMAN	Ubiquitin thioesterase OTUB1 (EC 3.4.19.12) (Deubiquitinating enzyme OTUB1) (OTU domain-containing ubiquitin aldehyde-binding protein 1) (Otubain-1) (hOTU1) (Ubiquitin-specific-processing protease OTUB1)
Plate 1 crRNA 3	B03	CM-010983-03	OTUB2	78990	GAACACGTGGTGGTTCAGGG	hg38|-chr14:94045819-94045841	CGG	NM_023112.3 (Exon6)	Q96DC9	OTUB2_HUMAN	Ubiquitin thioesterase OTUB2 (EC 3.4.19.12) (Deubiquitinating enzyme OTUB2) (OTU domain-containing ubiquitin aldehyde-binding protein 2) (Otubain-2) (Ubiquitin-specific-processing protease OTUB2)
Plate 1 crRNA 3	B04	CM-026487-03	OTUD1	220213	CTCCACCTCGGCCAGGTATA	hg38|-chr10:23440329-23440351	GGG	NM_001145373 (Exon1)	Q5VV17	OTUD1_HUMAN	OTU domain-containing protein 1 (EC 3.4.19.12) (DUBA-7)
Plate 1 crRNA 3	B05	CM-009927-03	OTUD4	54726	ACAGGAATGGGTAGGACAAG	hg38|-chr4:145165179-145165201	TGG	NM_001102653 (Exon4),NM_017493 (Exon3)	Q01804	OTUD4_HUMAN	OTU domain-containing protein 4 (EC 3.4.19.12) (HIV-1-induced protein HIN-1)
Plate 1 crRNA 3	B06	CM-013823-03	OTUD5	55593	ATCCCATGGAATGTGTTGAT	hg38|+chrX:48934588-48934610	GGG	NM_001136159 (Exon5),NM_001136158 (Exon5),NM_001136157 (Exon5),NM_017602 (Exon5)	Q96G74	OTUD5_HUMAN	OTU domain-containing protein 5 (EC 3.4.19.12) (Deubiquitinating enzyme A) (DUBA)
Plate 1 crRNA 3	B07	CM-008553-03	OTUD6B	51633	TATTGTAAACACAGCTGCAT	hg38|+chr8:91080694-91080716	GGG	NM_001286745 (Exon6),NM_016023 (Exon5)	Q8N6M0	OTU6B_HUMAN	Deubiquitinase OTUD6B (EC 3.4.19.12) (DUBA-5) (OTU domain-containing protein 6B)
Plate 1 crRNA 3	B08	CM-008841-03	OTUD7A	161725	GCTGTGCAGAAGGTTCAGCT	hg38|+chr15:31487236-31487258	TGG	NM_130901 (Exon10)	Q8TE49	OTU7A_HUMAN	OTU domain-containing protein 7A (EC 3.4.19.12) (Zinc finger protein Cezanne 2)
Plate 1 crRNA 3	B09	CM-008670-03	OTUD7B	56957	GGTGTCTGCCACGACGACTA	hg38|+chr1:149950119-149950141	TGG	NM_020205 (Exon8)	Q6GQQ9	OTU7B_HUMAN	OTU domain-containing protein 7B (EC 3.4.19.12) (Cellular zinc finger anti-NF-kappa-B protein) (Cezanne) (Zinc finger A20 domain-containing protein 1) (Zinc finger protein Cezanne)
Plate 1 crRNA 3	B10	CM-016115-03	PARP11	57097	TCTATCAGTGCTTTCAGGTA	hg38|-chr12:3826152-3826174	TGG	NM_020367.5 (Exon4),NR_104461.1 (Exon4),NM_001286522.1 (Exon4),NM_001286521.1 (Exon3)	Q9NR21	PAR11_HUMAN	Protein mono-ADP-ribosyltransferase PARP11 (EC 2.4.2.-) (ADP-ribosyltransferase diphtheria toxin-like 11) (ARTD11) (Poly [ADP-ribose] polymerase 11) (PARP-11)
Plate 1 crRNA 3	B11	CM-012252-03	PRPF8	10594	ATTGGTCCTTAGGTGCAGGT	hg38|+chr17:1653647-1653669	TGG	NM_006445 (Exon39)	Q6P2Q9	PRP8_HUMAN	Pre-mRNA-processing-splicing factor 8 (220 kDa U5 snRNP-specific protein) (PRP8 homolog) (Splicing factor Prp8) (p220)
Plate 1 crRNA 3	C02	CM-006024-03	PSMD14	10213	TACCAACCAACAACCATCTC	hg38|-chr2:161371173-161371195	CGG	NM_005805.5 (Exon7)	O00487	PSDE_HUMAN	26S proteasome non-ATPase regulatory subunit 14 (EC 3.4.19.-) (26S proteasome regulatory subunit RPN11) (26S proteasome-associated PAD1 homolog 1)
Plate 1 crRNA 3	C03	CM-015500-03	JOSD2	126119	CTGCTGCAGAACGTTGTTGA	hg38|+chr19:50510327-50510349	GGG	NM_138334.3 (Exon2),NM_001270686.1 (Exon2),NM_001270641.1 (Exon2),NM_001270639.1 (Exon2),NM_001270640.1 (Exon2)	Q8TAC2	JOS2_HUMAN	Josephin-2 (EC 3.4.19.12) (Josephin domain-containing protein 2)
Plate 1 crRNA 3	C04	CM-006033-03	SENP2	59343	TGAGCGCCGCCTCTTCAGGA	hg38|-chr3:185586487-185586509	GGG	NM_021627.2 (Exon1)	Q9HC62	SENP2_HUMAN	Sentrin-specific protease 2 (EC 3.4.22.-) (Axam2) (SMT3-specific isopeptidase 2) (Smt3ip2) (Sentrin/SUMO-specific protease SENP2)
Plate 1 crRNA 3	C05	CM-012202-03	STAMBP	10617	GTGAGTGTGTAGGTCGACAC	hg38|-chr2:73859282-73859304	TGG	NM_006463.4 (Exon9),NM_201647.2 (Exon8),NM_213622.2 (Exon8)	O95630	STABP_HUMAN	STAM-binding protein (EC 3.4.19.-) (Associated molecule with the SH3 domain of STAM) (Endosome-associated ubiquitin isopeptidase)
Plate 1 crRNA 3	C06	CM-005783-03	STAMBPL1	57559	ACTGCTTTGGCACAATTACA	hg38|-chr10:88916703-88916725	TGG	NM_020799.3 (Exon8)	Q96FJ0	STALP_HUMAN	AMSH-like protease (AMSH-LP) (EC 3.4.19.-) (STAM-binding protein-like 1)
Plate 1 crRNA 3	C07	CM-009919-03	TNFAIP3	7128	TGATGAATGATCCCATTAGT	hg38|-chr6:137871321-137871343	AGG	NM_001270508.1 (Exon2),NM_001270507.1 (Exon2),NM_006290.3 (Exon2)	P21580	TNAP3_HUMAN	Tumor necrosis factor alpha-induced protein 3 (TNF alpha-induced protein 3) (EC 2.3.2.-) (EC 3.4.19.12) (OTU domain-containing protein 7C) (Putative DNA-binding protein A20) (Zinc finger protein A20) [Cleaved into: A20p50; A20p37]
Plate 1 crRNA 3	C08	CM-012786-03	UBL3	5412	CATGGAAATGTCACATTAGG	hg38|-chr13:29772111-29772133	AGG	NM_007106.3 (Exon3)	O95164	UBL3_HUMAN	Ubiquitin-like protein 3 (Membrane-anchored ubiquitin-fold protein) (HsMUB) (MUB) (Protein HCG-1)
Plate 1 crRNA 3	C09	CM-020658-03	UBL4A	8266	ACTAGGTTGAGCTTGGAGTT	hg38|+chrX:154485925-154485947	GGG	NM_014235.4 (Exon3)	P11441	UBL4A_HUMAN	Ubiquitin-like protein 4A (Ubiquitin-like protein GDX)
Plate 1 crRNA 3	C10	CM-014320-03	UBL5	59286	TGTTCCAACGGGTACCAGTT	hg38|-chr19:9828634-9828656	TGG	NM_024292.3 (Exon3),NM_001048241.2 (Exon3),NM_024292.3 (Exon3),NM_001048241.2 (Exon3)	Q9BZL1	UBL5_HUMAN	Ubiquitin-like protein 5
Plate 1 crRNA 3	C11	CM-010691-03	UBR1	197131	GACACAGGCCGATAATACCA	hg38|+chr15:43007134-43007156	TGG	NM_174916 (Exon30)	Q8IWV7	UBR1_HUMAN	E3 ubiquitin-protein ligase UBR1 (EC 2.3.2.27) (N-recognin-1) (RING-type E3 ubiquitin transferase UBR1) (Ubiquitin-protein ligase E3-alpha-1) (Ubiquitin-protein ligase E3-alpha-I)
Plate 1 crRNA 3	D02	CM-018385-03	UBTD1	80019	GATCTCCTTGCGGCCCTCGA	hg38|-chr10:97568022-97568044	AGG	NM_024954.4 (Exon2)	Q9HAC8	UBTD1_HUMAN	Ubiquitin domain-containing protein 1
Plate 1 crRNA 3	D03	CM-016592-03	UBTD2	92181	AGCCTCAACGAGAACTCGGA	hg38|-chr5:172283604-172283626	GGG	NM_152277 (Exon1)	Q8WUN7	UBTD2_HUMAN	Ubiquitin domain-containing protein 2 (Dendritic cell-derived ubiquitin-like protein) (DC-UbP) (Ubiquitin-like protein SB72)
Plate 1 crRNA 3	D04	CM-004309-03	UCHL1	7345	AAGACAAACTGGGATTTGGT	hg38|+chr4:41260780-41260802	AGG	NM_004181.4 (Exon4)	P09936	UCHL1_HUMAN	Ubiquitin carboxyl-terminal hydrolase isozyme L1 (UCH-L1) (EC 3.4.19.12) (Neuron cytoplasmic protein 9.5) (PGP 9.5) (PGP9.5) (Ubiquitin thioesterase L1)
Plate 1 crRNA 3	D05	CM-006059-03	UCHL3	7347	GGTATCTGGCTCGTTCTTCA	hg38|-chr13:75567276-75567298	GGG	NM_006002.4 (Exon5),NM_001270952.1 (Exon5)	P15374	UCHL3_HUMAN	Ubiquitin carboxyl-terminal hydrolase isozyme L3 (UCH-L3) (EC 3.4.19.12) (Ubiquitin thioesterase L3)
Plate 1 crRNA 3	D06	CM-006060-03	UCHL5	51377	TCATACAGTCTCCCATTAAC	hg38|+chr1:193029214-193029236	AGG	NM_015984.3 (Exon6),NM_001199263.1 (Exon6),NM_001199262.1 (Exon6),NM_001199261.1 (Exon6),NR_037607.1 (Exon6)	Q9Y5K5	UCHL5_HUMAN	Ubiquitin carboxyl-terminal hydrolase isozyme L5 (UCH-L5) (EC 3.4.19.12) (Ubiquitin C-terminal hydrolase UCH37) (Ubiquitin thioesterase L5)
Plate 1 crRNA 3	D07	CM-005077-03	UCK2	7371	CTGCACGATCTTAGCACACA	hg38|-chr1:165890208-165890230	CGG	NM_012474.4 (Exon2)	Q9BZX2	UCK2_HUMAN	Uridine-cytidine kinase 2 (UCK 2) (EC 2.7.1.48) (Cytidine monophosphokinase 2) (Testis-specific protein TSA903) (Uridine monophosphokinase 2)
Plate 1 crRNA 3	D08	CM-008494-03	UEVLD	55293	CACTTACCCTGATACATCAC	hg38|+chr11:18575340-18575362	AGG	NM_001261386 (Exon3),NM_001297771 (Exon3),NM_001261385 (Exon3),NM_001261384 (Exon2),NM_018314 (Exon3),NM_001040697 (Exon3)	Q8IX04	UEVLD_HUMAN	Ubiquitin-conjugating enzyme E2 variant 3 (UEV-3) (EV and lactate/malate dehydrogenase domain-containing protein)
Plate 1 crRNA 3	D09	CM-017918-03	UFD1L	7353	AGTTGGTCCAGGGCCGAGGG	hg38|+chr22:19475070-19475092	TGG	NM_005659 (Exon3),NM_001035247 (Exon3)	Q92890	UFD1_HUMAN	Ubiquitin recognition factor in ER-associated degradation protein 1 (Ubiquitin fusion degradation protein 1) (UB fusion protein 1)
Plate 1 crRNA 3	D10	CM-006061-03	USP1	7398	GCATAGAGATGGACAGTATG	hg38|+chr1:62444923-62444945	AGG	NM_003368.4 (Exon6),NM_001017416.1 (Exon6),NM_001017415.1 (Exon6)	O94782	UBP1_HUMAN	Ubiquitin carboxyl-terminal hydrolase 1 (EC 3.4.19.12) (Deubiquitinating enzyme 1) (hUBP) (Ubiquitin thioesterase 1) (Ubiquitin-specific-processing protease 1)
Plate 1 crRNA 3	D11	CM-006062-03	USP10	9100	GCTACAGGATCCTCTGAAAC	hg38|-chr16:84745637-84745659	CGG	NR_073578.1 (Exon3),NM_001272075.1 (Exon5),NM_005153.2 (Exon4)	Q14694	UBP10_HUMAN	Ubiquitin carboxyl-terminal hydrolase 10 (EC 3.4.19.12) (Deubiquitinating enzyme 10) (Ubiquitin thioesterase 10) (Ubiquitin-specific-processing protease 10)
Plate 1 crRNA 3	E02	CM-006063-03	USP11	8237	GGTCTCCATGATGATCAACT	hg38|-chrX:47240582-47240604	GGG	NM_004651 (Exon6)	P51784	UBP11_HUMAN	Ubiquitin carboxyl-terminal hydrolase 11 (EC 3.4.19.12) (Deubiquitinating enzyme 11) (Ubiquitin thioesterase 11) (Ubiquitin-specific-processing protease 11)
Plate 1 crRNA 3	E03	CM-027148-03	USP12	219333	ACAGCACACCAGACCCAACG	hg38|-chr13:27095661-27095683	TGG	NM_182488.3 (Exon4),NM_182488.3 (Exon4)	O75317	UBP12_HUMAN	Ubiquitin carboxyl-terminal hydrolase 12 (EC 3.4.19.12) (Deubiquitinating enzyme 12) (Ubiquitin thioesterase 12) (Ubiquitin-hydrolyzing enzyme 1) (Ubiquitin-specific-processing protease 12)
Plate 1 crRNA 3	E04	CM-006064-03	USP13	8975	GCCTGAAGGCAGGCACTAAA	hg38|-chr3:179745126-179745148	TGG	NM_003940 (Exon13)	Q92995	UBP13_HUMAN	Ubiquitin carboxyl-terminal hydrolase 13 (EC 3.4.19.12) (Deubiquitinating enzyme 13) (Isopeptidase T-3) (ISOT-3) (Ubiquitin thioesterase 13) (Ubiquitin-specific-processing protease 13)
Plate 1 crRNA 3	E05	CM-006065-03	USP14	9097	GCCTGCCAGACAGAAAGTTA	hg38|+chr18:163411-163433	TGG	NM_005151.3 (Exon2),NM_001037334.1 (Exon2)	P54578	UBP14_HUMAN	Ubiquitin carboxyl-terminal hydrolase 14 (EC 3.4.19.12) (Deubiquitinating enzyme 14) (Ubiquitin thioesterase 14) (Ubiquitin-specific-processing protease 14)
Plate 1 crRNA 3	E06	CM-006066-03	USP15	9958	ATCTTCTTCCACTAGCGGTA	hg38|-chr12:62260394-62260416	GGG	NM_006313 (Exon1),NM_001252078 (Exon1),NM_001252079 (Exon1)	Q9Y4E8	UBP15_HUMAN	Ubiquitin carboxyl-terminal hydrolase 15 (EC 3.4.19.12) (Deubiquitinating enzyme 15) (Ubiquitin thioesterase 15) (Ubiquitin-specific-processing protease 15) (Unph-2) (Unph4)
Plate 1 crRNA 3	E07	CM-006067-03	USP16	10600	TTAAGACACAGCCAAACTGA	hg38|-chr21:29030738-29030760	AGG	NM_006447.2 (Exon3),NM_001032410.1 (Exon4),NM_001001992.1 (Exon3)	Q9Y5T5	UBP16_HUMAN	Ubiquitin carboxyl-terminal hydrolase 16 (EC 3.4.19.12) (Deubiquitinating enzyme 16) (Ubiquitin thioesterase 16) (Ubiquitin-processing protease UBP-M) (Ubiquitin-specific-processing protease 16)
Plate 1 crRNA 3	E08	CM-004236-03	USP18	11274	CTTCACCCGGATCGTATACA	hg38|-chr22:18167906-18167928	GGG	NM_017414.3 (Exon6)	Q9UMW8	UBP18_HUMAN	Ubl carboxyl-terminal hydrolase 18 (EC 3.4.19.-) (43 kDa ISG15-specific protease) (hUBP43) (ISG15-specific-processing protease) (Ubl thioesterase 18)
Plate 1 crRNA 3	E09	CM-006068-03	USP19	10869	GTGATTGTCAAGCTTCGTGT	hg38|-chr3:49117728-49117750	GGG	NM_001199160 (Exon4),NM_001199162 (Exon4),NM_001199161 (Exon4),NM_006677 (Exon4),NM_006677.2 (Exon4),NM_001199160.1 (Exon4),NM_001199162.1 (Exon4),NM_001199161.1 (Exon4)	O94966	UBP19_HUMAN	Ubiquitin carboxyl-terminal hydrolase 19 (EC 3.4.19.12) (Deubiquitinating enzyme 19) (Ubiquitin thioesterase 19) (Ubiquitin-specific-processing protease 19) (Zinc finger MYND domain-containing protein 9)
Plate 1 crRNA 3	E10	CM-006069-03	USP2	9099	AGTGATTGGACACAGCGTAC	hg38|+chr11:119357269-119357291	AGG	NM_171997 (Exon11),NM_004205 (Exon12),NM_001243759 (Exon11),NM_004205.4 (Exon12),NM_171997.2 (Exon11),NM_001243759.1 (Exon11)	O75604	UBP2_HUMAN	Ubiquitin carboxyl-terminal hydrolase 2 (EC 3.4.19.12) (41 kDa ubiquitin-specific protease) (Deubiquitinating enzyme 2) (Ubiquitin thioesterase 2) (Ubiquitin-specific-processing protease 2)
Plate 1 crRNA 3	E11	CM-006070-03	USP20	10868	TCCATACAGGCTGTTCAGGT	hg38|-chr9:129880149-129880171	AGG	NM_006676.7 (Exon25),NM_001110303.3 (Exon25),NM_001008563.4 (Exon25),NM_006676.7 (Exon25),NM_001110303.3 (Exon25),NM_001008563.4 (Exon25)	Q9Y2K6	UBP20_HUMAN	Ubiquitin carboxyl-terminal hydrolase 20 (EC 3.4.19.12) (Deubiquitinating enzyme 20) (Ubiquitin thioesterase 20) (Ubiquitin-specific-processing protease 20) (VHL-interacting deubiquitinating enzyme 2) (hVDU2)
Plate 1 crRNA 3	F02	CM-006071-03	USP21	27005	CTCCTTCTCTGGATACAGGT	hg38|+chr1:161162709-161162731	GGG	NM_012475.4 (Exon5),NM_001014443.2 (Exon6)	Q9UK80	UBP21_HUMAN	Ubiquitin carboxyl-terminal hydrolase 21 (EC 3.4.19.12) (Deubiquitinating enzyme 21) (Ubiquitin thioesterase 21) (Ubiquitin-specific-processing protease 21)
Plate 1 crRNA 3	F03	CM-006072-03	USP22	23326	TCATTGTTGAGACTGTCCGT	hg38|+chr17:21004934-21004956	GGG	NM_015276 (Exon11)	Q9UPT9	UBP22_HUMAN	Ubiquitin carboxyl-terminal hydrolase 22 (EC 3.4.19.12) (Deubiquitinating enzyme 22) (Ubiquitin thioesterase 22) (Ubiquitin-specific-processing protease 22)
Plate 1 crRNA 3	F04	CM-006073-03	USP24	23358	TTGACTCGCTCTACTTGTAT	hg38|+chr1:55075489-55075511	AGG	NM_015306 (Exon63)	Q9UPU5	UBP24_HUMAN	Ubiquitin carboxyl-terminal hydrolase 24 (EC 3.4.19.12) (Deubiquitinating enzyme 24) (Ubiquitin thioesterase 24) (Ubiquitin-specific-processing protease 24)
Plate 1 crRNA 3	F05	CM-006074-03	USP25	29761	CTGGCTGTGGGAGTACTTGA	hg38|+chr21:15811189-15811211	AGG	NM_001283042.1 (Exon9),NM_001283041.1 (Exon9),NM_013396.4 (Exon9)	Q9UHP3	UBP25_HUMAN	Ubiquitin carboxyl-terminal hydrolase 25 (EC 3.4.19.12) (Deubiquitinating enzyme 25) (USP on chromosome 21) (Ubiquitin thioesterase 25) (Ubiquitin-specific-processing protease 25)
Plate 1 crRNA 3	F06	CM-006075-03	USP26	83844	CTGTGAGACCTGGTAAGGGT	hg38|-chrX:133027873-133027895	GGG	NM_031907 (Exon1)	Q9BXU7	UBP26_HUMAN	Ubiquitin carboxyl-terminal hydrolase 26 (EC 3.4.19.12) (Deubiquitinating enzyme 26) (Ubiquitin thioesterase 26) (Ubiquitin-specific-processing protease 26)
Plate 1 crRNA 3	F07	CM-031532-03	USP27X	389856	CGCTGCAATGAGGAACTCGT	hg38|-chrX:49880801-49880823	GGG	NM_001145073.2 (Exon1)	A6NNY8	UBP27_HUMAN	Ubiquitin carboxyl-terminal hydrolase 27 (EC 3.4.19.12) (Deubiquitinating enzyme 27) (Ubiquitin carboxyl-terminal hydrolase 22-like) (Ubiquitin thioesterase 27) (Ubiquitin-specific-processing protease 27) (X-linked ubiquitin carboxyl-terminal hydrolase 27)
Plate 1 crRNA 3	F08	CM-006076-03	USP28	57646	CTGATGGAAGAGATCTTAAC	hg38|-chr11:113841662-113841684	AGG	NM_001301029 (Exon2),NM_020886 (Exon4)	Q96RU2	UBP28_HUMAN	Ubiquitin carboxyl-terminal hydrolase 28 (EC 3.4.19.12) (Deubiquitinating enzyme 28) (Ubiquitin thioesterase 28) (Ubiquitin-specific-processing protease 28)
Plate 1 crRNA 3	F09	CM-006077-03	USP29	57663	GCATTCTTGTCTGGTTCAAC	hg38|-chr19:57130455-57130477	GGG	NM_020903.2 (Exon4)	Q9HBJ7	UBP29_HUMAN	Ubiquitin carboxyl-terminal hydrolase 29 (EC 3.4.19.12) (Deubiquitinating enzyme 29) (Ubiquitin thioesterase 29) (Ubiquitin-specific-processing protease 29)
Plate 1 crRNA 3	F10	CM-006078-03	USP3	9960	ACACTCTGTGCTTTATGGCA	hg38|+chr15:63562920-63562942	AGG	NM_006537.3 (Exon8),NM_001256702.1 (Exon7),NR_046341.1 (Exon9),NR_046342.1 (Exon9)	Q9Y6I4	UBP3_HUMAN	Ubiquitin carboxyl-terminal hydrolase 3 (EC 3.4.19.12) (Deubiquitinating enzyme 3) (Ubiquitin thioesterase 3) (Ubiquitin-specific-processing protease 3)
Plate 1 crRNA 3	F11	CM-021294-03	USP30	84749	CTGGGTTCTTGTTCAGTTTA	hg38|-chr12:109082995-109083017	GGG	NM_001301175 (Exon14),NM_032663 (Exon11)	Q70CQ3	UBP30_HUMAN	Ubiquitin carboxyl-terminal hydrolase 30 (EC 3.4.19.12) (Deubiquitinating enzyme 30) (Ubiquitin thioesterase 30) (Ubiquitin-specific-processing protease 30) (Ub-specific protease 30)
Plate 1 crRNA 3	G02	CM-022513-03	USP31	57478	AAGTCCTGCTCTTCCCAGGT	hg38|+chr16:23068657-23068679	GGG	NM_020718.3 (Exon16)	Q70CQ4	UBP31_HUMAN	Ubiquitin carboxyl-terminal hydrolase 31 (EC 3.4.19.12) (Deubiquitinating enzyme 31) (Ubiquitin thioesterase 31) (Ubiquitin-specific-processing protease 31)
Plate 1 crRNA 3	G03	CM-006080-03	USP32	84669	AATATGCTCCCAGGTTTAAT	hg38|-chr17:60209508-60209530	GGG	NM_032582 (Exon22),NM_032582.3 (Exon22)	Q8NFA0	UBP32_HUMAN	Ubiquitin carboxyl-terminal hydrolase 32 (EC 3.4.19.12) (Deubiquitinating enzyme 32) (Renal carcinoma antigen NY-REN-60) (Ubiquitin thioesterase 32) (Ubiquitin-specific-processing protease 32)
Plate 1 crRNA 3	G04	CM-006081-03	USP33	23032	CCTGCTTTGACTATAGAAGT	hg38|+chr1:77722087-77722109	TGG	NM_201626.2 (Exon14),NM_201624.2 (Exon13),NM_015017.4 (Exon14)	Q8TEY7	UBP33_HUMAN	Ubiquitin carboxyl-terminal hydrolase 33 (EC 3.4.19.12) (Deubiquitinating enzyme 33) (Ubiquitin thioesterase 33) (Ubiquitin-specific-processing protease 33) (VHL-interacting deubiquitinating enzyme 1) (hVDU1)
Plate 1 crRNA 3	G05	CM-006082-03	USP34	9736	TTGTATCTTTGGGTGCACCA	hg38|-chr2:61301131-61301153	AGG	NM_014709 (Exon29)	Q70CQ2	UBP34_HUMAN	Ubiquitin carboxyl-terminal hydrolase 34 (EC 3.4.19.12) (Deubiquitinating enzyme 34) (Ubiquitin thioesterase 34) (Ubiquitin-specific-processing protease 34)
Plate 1 crRNA 3	G06	CM-006083-03	USP35	57558	GGCCTGCTCTAGGAACTCCA	hg38|-chr11:78196799-78196821	CGG	NM_020798.2 (Exon2)	Q9P2H5	UBP35_HUMAN	Ubiquitin carboxyl-terminal hydrolase 35 (EC 3.4.19.12) (Deubiquitinating enzyme 35) (Ubiquitin thioesterase 35) (Ubiquitin-specific-processing protease 35)
Plate 1 crRNA 3	G07	CM-006084-03	USP36	57602	TTTCCTTGGAGACTCTTCCA	hg38|+chr17:78802481-78802503	TGG	NM_025090.3 (Exon17),NM_025090.3 (Exon17)	Q9P275	UBP36_HUMAN	Ubiquitin carboxyl-terminal hydrolase 36 (EC 3.4.19.12) (Deubiquitinating enzyme 36) (Ubiquitin thioesterase 36) (Ubiquitin-specific-processing protease 36)
Plate 1 crRNA 3	G08	CM-006085-03	USP37	57695	CAGTATTGTAGTGAACTACT	hg38|+chr2:218558521-218558543	AGG	NM_020935.2 (Exon4)	Q86T82	UBP37_HUMAN	Ubiquitin carboxyl-terminal hydrolase 37 (EC 3.4.19.12) (Deubiquitinating enzyme 37) (Ubiquitin thioesterase 37) (Ubiquitin-specific-processing protease 37)
Plate 1 crRNA 3	G09	CM-006086-03	USP38	84640	GTGTTGGGCCTCCTTCATCA	hg38|+chr4:143185703-143185725	GGG	NM_001290326.1 (Exon1),NM_001290325.1 (Exon1),NM_032557.6 (Exon1)	Q8NB14	UBP38_HUMAN	Ubiquitin carboxyl-terminal hydrolase 38 (EC 3.4.19.12) (Deubiquitinating enzyme 38) (HP43.8KD) (Ubiquitin thioesterase 38) (Ubiquitin-specific-processing protease 38)
Plate 1 crRNA 3	G10	CM-006087-03	USP39	10713	GATGGTACCACTTACCTGCC	hg38|+chr2:85625614-85625636	GGG	NM_001256725 (Exon5),NM_001256728 (Exon4),NM_001256727 (Exon5),NR_046347 (Exon5),NM_001256726 (Exon5),NM_006590 (Exon5)	Q53GS9	SNUT2_HUMAN	U4/U6.U5 tri-snRNP-associated protein 2 (Inactive ubiquitin-specific peptidase 39) (SAD1 homolog) (U4/U6.U5 tri-snRNP-associated 65 kDa protein) (65K)
Plate 1 crRNA 3	G11	CM-004974-03	USP4	7375	GAGCCCAGGTTGTATATGAG	hg38|+chr3:49310671-49310693	AGG	NM_199443.2 (Exon7),NM_003363.3 (Exon8)	Q13107	UBP4_HUMAN	Ubiquitin carboxyl-terminal hydrolase 4 (EC 3.4.19.12) (Deubiquitinating enzyme 4) (Ubiquitin thioesterase 4) (Ubiquitin-specific-processing protease 4) (Ubiquitous nuclear protein homolog)
Plate 1 crRNA 3	H02	CM-006088-03	USP40	55230	TTTCTGTTTGAGAGACTACT	hg38|+chr2:233527472-233527494	GGG	NM_018218 (Exon12)	Q9NVE5	UBP40_HUMAN	Ubiquitin carboxyl-terminal hydrolase 40 (EC 3.4.19.12) (Deubiquitinating enzyme 40) (Ubiquitin thioesterase 40) (Ubiquitin-specific-processing protease 40)
Plate 1 crRNA 3	H03	CM-006089-03	USP42	84132	TTAAGCTCCCGGGATCACAC	hg38|-chr7:6154005-6154027	AGG	NM_032172.2 (Exon15)	Q9H9J4	UBP42_HUMAN	Ubiquitin carboxyl-terminal hydrolase 42 (EC 3.4.19.12) (Deubiquitinating enzyme 42) (Ubiquitin thioesterase 42) (Ubiquitin-specific-processing protease 42)
Plate 1 crRNA 3	H04	CM-023019-03	USP43	124739	GGATAGGTAGGGACACACAC	hg38|-chr17:9674945-9674967	AGG	NM_153210 (Exon4),NM_001267576 (Exon4)	Q70EL4	UBP43_HUMAN	Ubiquitin carboxyl-terminal hydrolase 43 (EC 3.4.19.12) (Deubiquitinating enzyme 43) (Ubiquitin thioesterase 43) (Ubiquitin-specific-processing protease 43)
Plate 1 crRNA 3	H05	CM-006091-03	USP44	84101	CACAGGAGAAGGATACTAAT	hg38|-chr12:95533781-95533803	GGG	NM_032147 (Exon2),NM_001278393 (Exon2),NM_001042403 (Exon2),NR_125360 (Exon1)	Q9H0E7	UBP44_HUMAN	Ubiquitin carboxyl-terminal hydrolase 44 (EC 3.4.19.12) (Deubiquitinating enzyme 44) (Ubiquitin thioesterase 44) (Ubiquitin-specific-processing protease 44)
Plate 1 crRNA 3	H06	CM-010054-03	USP45	85015	ATCTGAGCACATGGATTATA	hg38|-chr6:99507427-99507449	TGG	NM_001080481.1 (Exon4)	Q70EL2	UBP45_HUMAN	Ubiquitin carboxyl-terminal hydrolase 45 (EC 3.4.19.12) (Deubiquitinating enzyme 45) (Ubiquitin thioesterase 45) (Ubiquitin-specific-processing protease 45)
Plate 1 crRNA 3	H07	CM-006092-03	USP46	64854	GTGATATAATGCCCACGATT	hg38|+chr4:52598680-52598702	AGG	NM_022832 (Exon8),NM_001134223 (Exon8),NM_001286768 (Exon9),NM_001286767 (Exon8)	P62068	UBP46_HUMAN	Ubiquitin carboxyl-terminal hydrolase 46 (EC 3.4.19.12) (Deubiquitinating enzyme 46) (Ubiquitin thioesterase 46) (Ubiquitin-specific-processing protease 46)
Plate 1 crRNA 3	H08	CM-006093-03	USP47	55031	TTGATTATACAACCATGCAT	hg38|+chr11:11920400-11920422	AGG	NM_001282659.1 (Exon10),NM_017944.3 (Exon9)	Q96K76	UBP47_HUMAN	Ubiquitin carboxyl-terminal hydrolase 47 (EC 3.4.19.12) (Deubiquitinating enzyme 47) (Ubiquitin thioesterase 47) (Ubiquitin-specific-processing protease 47)
Plate 1 crRNA 3	H09	CM-006079-03	USP48	84196	TGCGCTGAGTTCATACACGT	hg38|+chr1:21736597-21736619	AGG	NM_032236.5 (Exon9),NM_001032730.1 (Exon9)	Q86UV5	UBP48_HUMAN	Ubiquitin carboxyl-terminal hydrolase 48 (EC 3.4.19.12) (Deubiquitinating enzyme 48) (Ubiquitin thioesterase 48) (Ubiquitin-specific peptidase 48) (Ubiquitin-specific protease 48) (Ubiquitin-specific-processing protease 48)
Plate 1 crRNA 3	H10	CM-005945-03	USP49	25862	CATGGAACCTTACTGCTGCA	hg38|-chr6:41798844-41798866	GGG	NM_001286554 (Exon5),NM_018561 (Exon7),NM_018561.4 (Exon7),NM_001286554.1 (Exon5)	Q70CQ1	UBP49_HUMAN	Ubiquitin carboxyl-terminal hydrolase 49 (EC 3.4.19.12) (Deubiquitinating enzyme 49) (Ubiquitin thioesterase 49) (Ubiquitin-specific-processing protease 49)
Plate 1 crRNA 3	H11	CM-006095-03	USP5	8078	CTGTGTAGCCAGGCCCAAAC	hg38|-chr12:6858516-6858538	AGG	NM_001098536.1 (Exon8),NM_003481.2 (Exon8)	P45974	UBP5_HUMAN	Ubiquitin carboxyl-terminal hydrolase 5 (EC 3.4.19.12) (Deubiquitinating enzyme 5) (Isopeptidase T) (Ubiquitin thioesterase 5) (Ubiquitin-specific-processing protease 5)
Plate 1 crRNA 4	A02	CM-005791-04	BAP1	8314	AGACCAATCCAAGGCAGCCA	hg38|-chr3:52403247-52403269	GGG	NM_004656.3 (Exon14),NM_004656.3 (Exon14)	Q92560	BAP1_HUMAN	Ubiquitin carboxyl-terminal hydrolase BAP1 (EC 3.4.19.12) (BRCA1-associated protein 1) (Cerebral protein 6)
Plate 1 crRNA 4	A03	CM-005814-04	COPS5	10987	GAAACTCCCTCGTCCCAGCT	hg38|+chr8:67045877-67045899	GGG	NM_006837.2 (Exon7)	Q92905	CSN5_HUMAN	COP9 signalosome complex subunit 5 (SGN5) (Signalosome subunit 5) (EC 3.4.-.-) (Jun activation domain-binding protein 1)
Plate 1 crRNA 4	A04	CM-005798-04	BRCC3	79184	TCTTACGACGTTCTGATAAG	hg38|+chrX:155077210-155077232	AGG	NM_001018055.2 (Exon4),NM_001242640.1 (Exon4),NM_024332.3 (Exon4),NM_001018055.2 (Exon4),NM_001242640.1 (Exon4),NM_024332.3 (Exon4)	P46736	BRCC3_HUMAN	Lys-63-specific deubiquitinase BRCC36 (EC 3.4.19.-) (BRCA1-A complex subunit BRCC36) (BRCA1/BRCA2-containing complex subunit 3) (BRCA1/BRCA2-containing complex subunit 36) (BRISC complex subunit BRCC36)
Plate 1 crRNA 4	A05	CM-004609-04	CYLD	1540	TAGCTCTTCCATTACAGACT	hg38|-chr16:50779851-50779873	GGG	NM_015247.2 (Exon10),NM_001042355.1 (Exon8),NM_001042412.1 (Exon8)	Q9NQC7	CYLD_HUMAN	Ubiquitin carboxyl-terminal hydrolase CYLD (EC 3.4.19.12) (Deubiquitinating enzyme CYLD) (Ubiquitin thioesterase CYLD) (Ubiquitin-specific-processing protease CYLD)
Plate 1 crRNA 4	A06	CM-027332-04	USP17L2	377630	ACTCAGAGGAAGCTTCTTCC	hg38|+chr8:12138548-12138570	TGG	NM_201402 (Exon1)	Q6R6M4	U17L2_HUMAN	Ubiquitin carboxyl-terminal hydrolase 17 (USP17) (EC 3.4.19.12) (Deubiquitinating enzyme 17-like protein 2) (Deubiquitinating protein 3) (DUB-3) (Ubiquitin carboxyl-terminal hydrolase 17-like protein 2) (Ubiquitin thioesterase 17-like protein 2) (Ubiquitin-specific-processing protease 17-like protein 2)
Plate 1 crRNA 4	A07	CM-013606-04	FBXO7	25793	CATGCTCTGTAGTGAATCGG	hg38|+chr22:32483983-32484005	TGG	NM_001257990 (Exon3),NM_012179 (Exon3),NM_001033024 (Exon3)	Q9Y3I1	FBX7_HUMAN	F-box only protein 7
Plate 1 crRNA 4	A08	CM-012435-04	FBXO8	26269	GTGAACTACTTTATGTCCAA	hg38|-chr4:174241193-174241215	GGG	NM_012180.2 (Exon4)	Q9NRD0	FBX8_HUMAN	F-box only protein 8 (F-box/SEC7 protein FBS)
Plate 1 crRNA 4	A09	CM-018630-04	MPND	84954	GGTGCTCACCAGGTAGTAGA	hg38|-chr19:4343981-4344003	TGG	NM_001159846 (Exon2),NM_032868 (Exon2),NM_001300862 (Exon2)	Q8N594	MPND_HUMAN	MPN domain-containing protein (EC 3.4.-.-)
Plate 1 crRNA 4	A10	CM-017674-04	JOSD1	9929	GTCCTGGAAGACGTTATTGA	hg38|+chr22:38699847-38699869	GGG	NM_014876.5 (Exon1)	Q15040	JOS1_HUMAN	Josephin-1 (EC 3.4.19.12) (Josephin domain-containing protein 1)
Plate 1 crRNA 4	A11	CM-005905-04	MYSM1	114803	GCAGCGTACAAGGAGACGTA	hg38|-chr1:58673632-58673654	GGG	NM_001085487 (Exon11)	Q5VVJ2	MYSM1_HUMAN	Histone H2A deubiquitinase MYSM1 (2A-DUB) (EC 3.4.19.-) (Myb-like, SWIRM and MPN domain-containing protein 1)
Plate 1 crRNA 4	B02	CM-021061-04	OTUB1	55611	AGGCCAGACAGTTAACACCT	hg38|-chr11:63988332-63988354	GGG	NM_017670.2 (Exon2),NR_003089.1 (Exon2)	Q96FW1	OTUB1_HUMAN	Ubiquitin thioesterase OTUB1 (EC 3.4.19.12) (Deubiquitinating enzyme OTUB1) (OTU domain-containing ubiquitin aldehyde-binding protein 1) (Otubain-1) (hOTU1) (Ubiquitin-specific-processing protease OTUB1)
Plate 1 crRNA 4	B03	CM-010983-04	OTUB2	78990	GGCCTTGGGCTATTCCTACC	hg38|+chr14:94039025-94039047	TGG	NM_023112.3 (Exon3)	Q96DC9	OTUB2_HUMAN	Ubiquitin thioesterase OTUB2 (EC 3.4.19.12) (Deubiquitinating enzyme OTUB2) (OTU domain-containing ubiquitin aldehyde-binding protein 2) (Otubain-2) (Ubiquitin-specific-processing protease OTUB2)
Plate 1 crRNA 4	B04	CM-026487-04	OTUD1	220213	GCTGAAGTGGTCGAGATGGT	hg38|-chr10:23440500-23440522	CGG	NM_001145373 (Exon1)	Q5VV17	OTUD1_HUMAN	OTU domain-containing protein 1 (EC 3.4.19.12) (DUBA-7)
Plate 1 crRNA 4	B05	CM-009927-04	OTUD4	54726	GAGCTTTCTTTATACTTTAT	hg38|+chr4:145162654-145162676	GGG	NM_001102653 (Exon6),NM_017493 (Exon5)	Q01804	OTUD4_HUMAN	OTU domain-containing protein 4 (EC 3.4.19.12) (HIV-1-induced protein HIN-1)
Plate 1 crRNA 4	B06	CM-013823-04	OTUD5	55593	CCATGGCCTGCATCTCAATG	hg38|+chrX:48934756-48934778	TGG	NM_001136159 (Exon4),NM_001136158 (Exon4),NM_001136157 (Exon4),NM_017602 (Exon4)	Q96G74	OTUD5_HUMAN	OTU domain-containing protein 5 (EC 3.4.19.12) (Deubiquitinating enzyme A) (DUBA)
Plate 1 crRNA 4	B07	CM-008553-04	OTUD6B	51633	ATGGCTTTGCATATACTCAG	hg38|-chr8:91078588-91078610	CGG	NM_001286745 (Exon5),NM_016023 (Exon4)	Q8N6M0	OTU6B_HUMAN	Deubiquitinase OTUD6B (EC 3.4.19.12) (DUBA-5) (OTU domain-containing protein 6B)
Plate 1 crRNA 4	B08	CM-008841-04	OTUD7A	161725	CGATGGGCCTTCTTAATATA	hg38|+chr15:31503733-31503755	TGG	NM_130901 (Exon7)	Q8TE49	OTU7A_HUMAN	OTU domain-containing protein 7A (EC 3.4.19.12) (Zinc finger protein Cezanne 2)
Plate 1 crRNA 4	B09	CM-008670-04	OTUD7B	56957	CTGTTCCAAGGCAACCAGCA	hg38|+chr1:149967298-149967320	TGG	NM_020205 (Exon4)	Q6GQQ9	OTU7B_HUMAN	OTU domain-containing protein 7B (EC 3.4.19.12) (Cellular zinc finger anti-NF-kappa-B protein) (Cezanne) (Zinc finger A20 domain-containing protein 1) (Zinc finger protein Cezanne)
Plate 1 crRNA 4	B10	CM-016115-04	PARP11	57097	GAATACTCAAGTACCATATC	hg38|-chr12:3822084-3822106	AGG	NM_020367.5 (Exon5),NR_104461.1 (Exon5),NM_001286522.1 (Exon5),NM_001286521.1 (Exon4)	Q9NR21	PAR11_HUMAN	Protein mono-ADP-ribosyltransferase PARP11 (EC 2.4.2.-) (ADP-ribosyltransferase diphtheria toxin-like 11) (ARTD11) (Poly [ADP-ribose] polymerase 11) (PARP-11)
Plate 1 crRNA 4	B11	CM-012252-04	PRPF8	10594	GGCCATTGCTCAGAACAGGT	hg38|-chr17:1661606-1661628	GGG	NM_006445 (Exon26)	Q6P2Q9	PRP8_HUMAN	Pre-mRNA-processing-splicing factor 8 (220 kDa U5 snRNP-specific protein) (PRP8 homolog) (Splicing factor Prp8) (p220)
Plate 1 crRNA 4	C02	CM-006024-04	PSMD14	10213	TTTGCATAAGAAGAGTTGGA	hg38|+chr2:161395089-161395111	TGG	NM_005805.5 (Exon10)	O00487	PSDE_HUMAN	26S proteasome non-ATPase regulatory subunit 14 (EC 3.4.19.-) (26S proteasome regulatory subunit RPN11) (26S proteasome-associated PAD1 homolog 1)
Plate 1 crRNA 4	C03	CM-015500-04	JOSD2	126119	TGCCGTTCGTGGTACACGGT	hg38|+chr19:50510376-50510398	GGG	NM_138334.3 (Exon2),NM_001270686.1 (Exon2),NM_001270641.1 (Exon2),NM_001270639.1 (Exon2),NM_001270640.1 (Exon2)	Q8TAC2	JOS2_HUMAN	Josephin-2 (EC 3.4.19.12) (Josephin domain-containing protein 2)
Plate 1 crRNA 4	C04	CM-006033-04	SENP2	59343	ACTGATACAGAGACGATGGT	hg38|+chr3:185613364-185613386	CGG	NM_021627.2 (Exon10)	Q9HC62	SENP2_HUMAN	Sentrin-specific protease 2 (EC 3.4.22.-) (Axam2) (SMT3-specific isopeptidase 2) (Smt3ip2) (Sentrin/SUMO-specific protease SENP2)
Plate 1 crRNA 4	C05	CM-012202-04	STAMBP	10617	GTTCCGGATCATCTCCTCGA	hg38|-chr2:73847502-73847524	AGG	NM_006463.4 (Exon6),NM_201647.2 (Exon5),NM_213622.2 (Exon5)	O95630	STABP_HUMAN	STAM-binding protein (EC 3.4.19.-) (Associated molecule with the SH3 domain of STAM) (Endosome-associated ubiquitin isopeptidase)
Plate 1 crRNA 4	C06	CM-005783-04	STAMBPL1	57559	TAGAGTAGCAGCTGGCGTTA	hg38|-chr10:88913423-88913445	AGG	NM_020799.3 (Exon6)	Q96FJ0	STALP_HUMAN	AMSH-like protease (AMSH-LP) (EC 3.4.19.-) (STAM-binding protein-like 1)
Plate 1 crRNA 4	C07	CM-009919-04	TNFAIP3	7128	TTGGAACGCTGGTGACAGGA	hg38|-chr6:137879114-137879136	AGG	NM_001270508.1 (Exon7),NM_001270507.1 (Exon7),NM_006290.3 (Exon7)	P21580	TNAP3_HUMAN	Tumor necrosis factor alpha-induced protein 3 (TNF alpha-induced protein 3) (EC 2.3.2.-) (EC 3.4.19.12) (OTU domain-containing protein 7C) (Putative DNA-binding protein A20) (Zinc finger protein A20) [Cleaved into: A20p50; A20p37]
Plate 1 crRNA 4	C08	CM-012786-04	UBL3	5412	GATGTCCAGTAATGTCCCGG	hg38|-chr13:29849517-29849539	CGG	NM_007106.3 (Exon1)	O95164	UBL3_HUMAN	Ubiquitin-like protein 3 (Membrane-anchored ubiquitin-fold protein) (HsMUB) (MUB) (Protein HCG-1)
Plate 1 crRNA 4	C09	CM-020658-04	UBL4A	8266	TTTGACCACTAGGTTGAGCT	hg38|+chrX:154485918-154485940	TGG	NM_014235.4 (Exon3)	P11441	UBL4A_HUMAN	Ubiquitin-like protein 4A (Ubiquitin-like protein GDX)
Plate 1 crRNA 4	C10	CM-014320-04	UBL5	59286	CCTTCAGATGAAATCCACGA	hg38|+chr19:9829958-9829980	TGG	NM_024292.3 (Exon5),NM_001048241.2 (Exon5)	Q9BZL1	UBL5_HUMAN	Ubiquitin-like protein 5
Plate 1 crRNA 4	C11	CM-010691-04	UBR1	197131	GGTTATAGCCAGGACAAATT	hg38|-chr15:43054772-43054794	GGG	NM_174916 (Exon12)	Q8IWV7	UBR1_HUMAN	E3 ubiquitin-protein ligase UBR1 (EC 2.3.2.27) (N-recognin-1) (RING-type E3 ubiquitin transferase UBR1) (Ubiquitin-protein ligase E3-alpha-1) (Ubiquitin-protein ligase E3-alpha-I)
Plate 1 crRNA 4	D02	CM-018385-04	UBTD1	80019	AAGAACCACCGCTGCCACGA	hg38|-chr10:97570395-97570417	TGG	NM_024954.4 (Exon3)	Q9HAC8	UBTD1_HUMAN	Ubiquitin domain-containing protein 1
Plate 1 crRNA 4	D03	CM-016592-04	UBTD2	92181	TGGACAACTACGCAGCAAGA	hg38|-chr5:172234266-172234288	GGG	NM_152277 (Exon2)	Q8WUN7	UBTD2_HUMAN	Ubiquitin domain-containing protein 2 (Dendritic cell-derived ubiquitin-like protein) (DC-UbP) (Ubiquitin-like protein SB72)
Plate 1 crRNA 4	D04	CM-004309-04	UCHL1	7345	TGTGCCACAGGAATTCCCAA	hg38|-chr4:41260726-41260748	TGG	NM_004181.4 (Exon4)	P09936	UCHL1_HUMAN	Ubiquitin carboxyl-terminal hydrolase isozyme L1 (UCH-L1) (EC 3.4.19.12) (Neuron cytoplasmic protein 9.5) (PGP 9.5) (PGP9.5) (Ubiquitin thioesterase L1)
Plate 1 crRNA 4	D05	CM-006059-04	UCHL3	7347	AATCAGTCCAATTGTTCCAC	hg38|-chr13:75566792-75566814	AGG	NM_006002.4 (Exon4),NM_001270952.1 (Exon4)	P15374	UCHL3_HUMAN	Ubiquitin carboxyl-terminal hydrolase isozyme L3 (UCH-L3) (EC 3.4.19.12) (Ubiquitin thioesterase L3)
Plate 1 crRNA 4	D06	CM-006060-04	UCHL5	51377	GCCTAAATGGACATCCTGGT	hg38|+chr1:193029580-193029602	GGG	NM_015984.3 (Exon4),NM_001199263.1 (Exon4),NM_001199262.1 (Exon4),NM_001199261.1 (Exon4),NR_037607.1 (Exon4)	Q9Y5K5	UCHL5_HUMAN	Ubiquitin carboxyl-terminal hydrolase isozyme L5 (UCH-L5) (EC 3.4.19.12) (Ubiquitin C-terminal hydrolase UCH37) (Ubiquitin thioesterase L5)
Plate 1 crRNA 4	D07	CM-005077-04	UCK2	7371	CCAGATTATCTGCACCTCTA	hg38|-chr1:165905947-165905969	GGG	NM_012474.4 (Exon6)	Q9BZX2	UCK2_HUMAN	Uridine-cytidine kinase 2 (UCK 2) (EC 2.7.1.48) (Cytidine monophosphokinase 2) (Testis-specific protein TSA903) (Uridine monophosphokinase 2)
Plate 1 crRNA 4	D08	CM-008494-04	UEVLD	55293	GAGGATATGATTCTTACCAT	hg38|+chr11:18578707-18578729	AGG	NM_001261386 (Exon2),NM_001297771 (Exon2),NM_001261385 (Exon2),NM_001261383 (Exon2),NM_018314 (Exon2),NM_001261382 (Exon2),NM_001040697 (Exon2)	Q8IX04	UEVLD_HUMAN	Ubiquitin-conjugating enzyme E2 variant 3 (UEV-3) (EV and lactate/malate dehydrogenase domain-containing protein)
Plate 1 crRNA 4	D09	CM-017918-04	UFD1L	7353	ATGATGGACACTGCCTTGTC	hg38|+chr22:19458087-19458109	GGG	NM_005659 (Exon7),NM_001035247 (Exon7)	Q92890	UFD1_HUMAN	Ubiquitin recognition factor in ER-associated degradation protein 1 (Ubiquitin fusion degradation protein 1) (UB fusion protein 1)
Plate 1 crRNA 4	D10	CM-006061-04	USP1	7398	AGAAATACCTCATCCGAAAG	hg38|+chr1:62444882-62444904	AGG	NM_003368.4 (Exon6),NM_001017416.1 (Exon6),NM_001017415.1 (Exon6)	O94782	UBP1_HUMAN	Ubiquitin carboxyl-terminal hydrolase 1 (EC 3.4.19.12) (Deubiquitinating enzyme 1) (hUBP) (Ubiquitin thioesterase 1) (Ubiquitin-specific-processing protease 1)
Plate 1 crRNA 4	D11	CM-006062-04	USP10	9100	GCTGTGGATAAACTACCTGA	hg38|+chr16:84740348-84740370	TGG	NM_001272075.1 (Exon4),NM_005153.2 (Exon3)	Q14694	UBP10_HUMAN	Ubiquitin carboxyl-terminal hydrolase 10 (EC 3.4.19.12) (Deubiquitinating enzyme 10) (Ubiquitin thioesterase 10) (Ubiquitin-specific-processing protease 10)
Plate 1 crRNA 4	E02	CM-006063-04	USP11	8237	CCGGATAGGAAACTCCACGA	hg38|-chrX:47247200-47247222	GGG	NM_004651 (Exon18)	P51784	UBP11_HUMAN	Ubiquitin carboxyl-terminal hydrolase 11 (EC 3.4.19.12) (Deubiquitinating enzyme 11) (Ubiquitin thioesterase 11) (Ubiquitin-specific-processing protease 11)
Plate 1 crRNA 4	E03	CM-027148-04	USP12	219333	TTTATAGGGCGCCAATGCTT	hg38|-chr13:27116581-27116603	CGG	NM_182488.3 (Exon2),NM_182488.3 (Exon2)	O75317	UBP12_HUMAN	Ubiquitin carboxyl-terminal hydrolase 12 (EC 3.4.19.12) (Deubiquitinating enzyme 12) (Ubiquitin thioesterase 12) (Ubiquitin-hydrolyzing enzyme 1) (Ubiquitin-specific-processing protease 12)
Plate 1 crRNA 4	E04	CM-006064-04	USP13	8975	AAAGCAGGACCCAGACACGT	hg38|+chr3:179706981-179707003	GGG	NM_003940 (Exon5)	Q92995	UBP13_HUMAN	Ubiquitin carboxyl-terminal hydrolase 13 (EC 3.4.19.12) (Deubiquitinating enzyme 13) (Isopeptidase T-3) (ISOT-3) (Ubiquitin thioesterase 13) (Ubiquitin-specific-processing protease 13)
Plate 1 crRNA 4	E05	CM-006065-04	USP14	9097	TCATGTAACAAGTGTTACCA	hg38|-chr18:180262-180284	AGG	NM_005151.3 (Exon5),NM_001037334.1 (Exon4)	P54578	UBP14_HUMAN	Ubiquitin carboxyl-terminal hydrolase 14 (EC 3.4.19.12) (Deubiquitinating enzyme 14) (Ubiquitin thioesterase 14) (Ubiquitin-specific-processing protease 14)
Plate 1 crRNA 4	E06	CM-006066-04	USP15	9958	TGAACCAGCGACTATCGACT	hg38|-chr12:62294182-62294204	AGG	NM_006313 (Exon2),NM_001252078 (Exon2),NM_001252079 (Exon2)	Q9Y4E8	UBP15_HUMAN	Ubiquitin carboxyl-terminal hydrolase 15 (EC 3.4.19.12) (Deubiquitinating enzyme 15) (Ubiquitin thioesterase 15) (Ubiquitin-specific-processing protease 15) (Unph-2) (Unph4)
Plate 1 crRNA 4	E07	CM-006067-04	USP16	10600	AGGCTTTAGTGAATGTGGAA	hg38|+chr21:29030646-29030668	TGG	NM_006447.2 (Exon3),NM_001032410.1 (Exon4),NM_001001992.1 (Exon3)	Q9Y5T5	UBP16_HUMAN	Ubiquitin carboxyl-terminal hydrolase 16 (EC 3.4.19.12) (Deubiquitinating enzyme 16) (Ubiquitin thioesterase 16) (Ubiquitin-processing protease UBP-M) (Ubiquitin-specific-processing protease 16)
Plate 1 crRNA 4	E08	CM-004236-04	USP18	11274	ATGACCATGAGGGTAGTCCC	hg38|-chr22:18157803-18157825	AGG	NM_017414.3 (Exon2)	Q9UMW8	UBP18_HUMAN	Ubl carboxyl-terminal hydrolase 18 (EC 3.4.19.-) (43 kDa ISG15-specific protease) (hUBP43) (ISG15-specific-processing protease) (Ubl thioesterase 18)
Plate 1 crRNA 4	E09	CM-006068-04	USP19	10869	GGTAGCCAATGTTCTCAGGT	hg38|+chr3:49111984-49112006	CGG	NM_001199160 (Exon20),NM_001199162 (Exon20),NM_001199161 (Exon20),NM_006677 (Exon19),NM_006677.2 (Exon19),NM_001199160.1 (Exon20),NM_001199162.1 (Exon20),NM_001199161.1 (Exon20)	O94966	UBP19_HUMAN	Ubiquitin carboxyl-terminal hydrolase 19 (EC 3.4.19.12) (Deubiquitinating enzyme 19) (Ubiquitin thioesterase 19) (Ubiquitin-specific-processing protease 19) (Zinc finger MYND domain-containing protein 9)
Plate 1 crRNA 4	E10	CM-006069-04	USP2	9099	GAAGATGATCGAGGTTCTCA	hg38|+chr11:119359025-119359047	GGG	NM_171997 (Exon5),NM_004205 (Exon6),NM_001243759 (Exon5)	O75604	UBP2_HUMAN	Ubiquitin carboxyl-terminal hydrolase 2 (EC 3.4.19.12) (41 kDa ubiquitin-specific protease) (Deubiquitinating enzyme 2) (Ubiquitin thioesterase 2) (Ubiquitin-specific-processing protease 2)
Plate 1 crRNA 4	E11	CM-006070-04	USP20	10868	GGTCACCGGACCAAACCTAT	hg38|+chr9:129856327-129856349	GGG	NM_006676.7 (Exon4),NM_001110303.3 (Exon4),NM_001008563.4 (Exon4),NM_006676.7 (Exon4),NM_001110303.3 (Exon4),NM_001008563.4 (Exon4)	Q9Y2K6	UBP20_HUMAN	Ubiquitin carboxyl-terminal hydrolase 20 (EC 3.4.19.12) (Deubiquitinating enzyme 20) (Ubiquitin thioesterase 20) (Ubiquitin-specific-processing protease 20) (VHL-interacting deubiquitinating enzyme 2) (hVDU2)
Plate 1 crRNA 4	F02	CM-006071-04	USP21	27005	TCACAGCTTCGCAGGAGTCA	hg38|-chr1:161162646-161162668	GGG	NM_012475.4 (Exon5),NM_001014443.2 (Exon6)	Q9UK80	UBP21_HUMAN	Ubiquitin carboxyl-terminal hydrolase 21 (EC 3.4.19.12) (Deubiquitinating enzyme 21) (Ubiquitin thioesterase 21) (Ubiquitin-specific-processing protease 21)
Plate 1 crRNA 4	F03	CM-006072-04	USP22	23326	ACCAGGTGCAGCAACTTATA	hg38|+chr17:21015847-21015869	CGG	NM_015276 (Exon6)	Q9UPT9	UBP22_HUMAN	Ubiquitin carboxyl-terminal hydrolase 22 (EC 3.4.19.12) (Deubiquitinating enzyme 22) (Ubiquitin thioesterase 22) (Ubiquitin-specific-processing protease 22)
Plate 1 crRNA 4	F04	CM-006073-04	USP24	23358	TAATCCTACCTGTACCACGG	hg38|+chr1:55162190-55162212	AGG	NM_015306 (Exon8)	Q9UPU5	UBP24_HUMAN	Ubiquitin carboxyl-terminal hydrolase 24 (EC 3.4.19.12) (Deubiquitinating enzyme 24) (Ubiquitin thioesterase 24) (Ubiquitin-specific-processing protease 24)
Plate 1 crRNA 4	F05	CM-006074-04	USP25	29761	GAATCCCTCCAAACTTCTGT	hg38|-chr21:15791551-15791573	AGG	NM_001283042.1 (Exon5),NM_001283041.1 (Exon5),NM_013396.4 (Exon5)	Q9UHP3	UBP25_HUMAN	Ubiquitin carboxyl-terminal hydrolase 25 (EC 3.4.19.12) (Deubiquitinating enzyme 25) (USP on chromosome 21) (Ubiquitin thioesterase 25) (Ubiquitin-specific-processing protease 25)
Plate 1 crRNA 4	F06	CM-006075-04	USP26	83844	GTGTGGAGCCAGGATATCTT	hg38|+chrX:133026418-133026440	TGG	NM_031907 (Exon1)	Q9BXU7	UBP26_HUMAN	Ubiquitin carboxyl-terminal hydrolase 26 (EC 3.4.19.12) (Deubiquitinating enzyme 26) (Ubiquitin thioesterase 26) (Ubiquitin-specific-processing protease 26)
Plate 1 crRNA 4	F07	CM-031532-04	USP27X	389856	GTTGCCTGTACCCTGCTAAA	hg38|-chrX:49880772-49880794	TGG	NM_001145073.2 (Exon1)	A6NNY8	UBP27_HUMAN	Ubiquitin carboxyl-terminal hydrolase 27 (EC 3.4.19.12) (Deubiquitinating enzyme 27) (Ubiquitin carboxyl-terminal hydrolase 22-like) (Ubiquitin thioesterase 27) (Ubiquitin-specific-processing protease 27) (X-linked ubiquitin carboxyl-terminal hydrolase 27)
Plate 1 crRNA 4	F08	CM-006076-04	USP28	57646	GCAGCCCTGGATCTATTAAA	hg38|-chr11:113833448-113833470	GGG	NM_001301029 (Exon5),NM_020886 (Exon7)	Q96RU2	UBP28_HUMAN	Ubiquitin carboxyl-terminal hydrolase 28 (EC 3.4.19.12) (Deubiquitinating enzyme 28) (Ubiquitin thioesterase 28) (Ubiquitin-specific-processing protease 28)
Plate 1 crRNA 4	F09	CM-006077-04	USP29	57663	GGTCTCTTCTGTATGTTCCT	hg38|-chr19:57130954-57130976	GGG	NM_020903.2 (Exon4)	Q9HBJ7	UBP29_HUMAN	Ubiquitin carboxyl-terminal hydrolase 29 (EC 3.4.19.12) (Deubiquitinating enzyme 29) (Ubiquitin thioesterase 29) (Ubiquitin-specific-processing protease 29)
Plate 1 crRNA 4	F10	CM-006078-04	USP3	9960	GTTGTCACGGCTATATTCGG	hg38|+chr15:63574062-63574084	AGG	NM_006537.3 (Exon10),NM_001256702.1 (Exon9),NR_046341.1 (Exon11),NR_046342.1 (Exon11)	Q9Y6I4	UBP3_HUMAN	Ubiquitin carboxyl-terminal hydrolase 3 (EC 3.4.19.12) (Deubiquitinating enzyme 3) (Ubiquitin thioesterase 3) (Ubiquitin-specific-processing protease 3)
Plate 1 crRNA 4	F11	CM-021294-04	USP30	84749	GATGTAGGGTGAGGTGACCC	hg38|-chr12:109073434-109073456	TGG	NM_001301175 (Exon10),NM_032663 (Exon7)	Q70CQ3	UBP30_HUMAN	Ubiquitin carboxyl-terminal hydrolase 30 (EC 3.4.19.12) (Deubiquitinating enzyme 30) (Ubiquitin thioesterase 30) (Ubiquitin-specific-processing protease 30) (Ub-specific protease 30)
Plate 1 crRNA 4	G02	CM-022513-04	USP31	57478	ATGGTCAGCCAACAGCTCGG	hg38|-chr16:23073725-23073747	TGG	NM_020718.3 (Exon14)	Q70CQ4	UBP31_HUMAN	Ubiquitin carboxyl-terminal hydrolase 31 (EC 3.4.19.12) (Deubiquitinating enzyme 31) (Ubiquitin thioesterase 31) (Ubiquitin-specific-processing protease 31)
Plate 1 crRNA 4	G03	CM-006080-04	USP32	84669	CTGTAACATACCAGGATGGG	hg38|+chr17:60185449-60185471	TGG	NM_032582 (Exon30),NM_032582.3 (Exon30)	Q8NFA0	UBP32_HUMAN	Ubiquitin carboxyl-terminal hydrolase 32 (EC 3.4.19.12) (Deubiquitinating enzyme 32) (Renal carcinoma antigen NY-REN-60) (Ubiquitin thioesterase 32) (Ubiquitin-specific-processing protease 32)
Plate 1 crRNA 4	G04	CM-006081-04	USP33	23032	GTGCCTACTACTCTGTTTCA	hg38|-chr1:77729903-77729925	AGG	NM_201626.2 (Exon10),NM_201624.2 (Exon9),NM_015017.4 (Exon10)	Q8TEY7	UBP33_HUMAN	Ubiquitin carboxyl-terminal hydrolase 33 (EC 3.4.19.12) (Deubiquitinating enzyme 33) (Ubiquitin thioesterase 33) (Ubiquitin-specific-processing protease 33) (VHL-interacting deubiquitinating enzyme 1) (hVDU1)
Plate 1 crRNA 4	G05	CM-006082-04	USP34	9736	GCAAACCTTCATAGGCAACT	hg38|+chr2:61192954-61192976	AGG	NM_014709 (Exon76)	Q70CQ2	UBP34_HUMAN	Ubiquitin carboxyl-terminal hydrolase 34 (EC 3.4.19.12) (Deubiquitinating enzyme 34) (Ubiquitin thioesterase 34) (Ubiquitin-specific-processing protease 34)
Plate 1 crRNA 4	G06	CM-006083-04	USP35	57558	TACCCGGTCAGCGTGAAGCA	hg38|+chr11:78196282-78196304	GGG	NM_020798.2 (Exon2)	Q9P2H5	UBP35_HUMAN	Ubiquitin carboxyl-terminal hydrolase 35 (EC 3.4.19.12) (Deubiquitinating enzyme 35) (Ubiquitin thioesterase 35) (Ubiquitin-specific-processing protease 35)
Plate 1 crRNA 4	G07	CM-006084-04	USP36	57602	CCTCTGCGGCTCTCCCACAA	hg38|+chr17:78803729-78803751	AGG	NM_025090.3 (Exon16),NM_025090.3 (Exon16)	Q9P275	UBP36_HUMAN	Ubiquitin carboxyl-terminal hydrolase 36 (EC 3.4.19.12) (Deubiquitinating enzyme 36) (Ubiquitin thioesterase 36) (Ubiquitin-specific-processing protease 36)
Plate 1 crRNA 4	G08	CM-006085-04	USP37	57695	GTCTTAATCGATCCTCTACC	hg38|+chr2:218547003-218547025	CGG	NM_020935.2 (Exon7)	Q86T82	UBP37_HUMAN	Ubiquitin carboxyl-terminal hydrolase 37 (EC 3.4.19.12) (Deubiquitinating enzyme 37) (Ubiquitin thioesterase 37) (Ubiquitin-specific-processing protease 37)
Plate 1 crRNA 4	G09	CM-006086-04	USP38	84640	TCTCATCAGGAGCCTTACTA	hg38|+chr4:143187896-143187918	CGG	NM_001290326.1 (Exon2),NM_001290325.1 (Exon2),NM_032557.6 (Exon2)	Q8NB14	UBP38_HUMAN	Ubiquitin carboxyl-terminal hydrolase 38 (EC 3.4.19.12) (Deubiquitinating enzyme 38) (HP43.8KD) (Ubiquitin thioesterase 38) (Ubiquitin-specific-processing protease 38)
Plate 1 crRNA 4	G10	CM-006087-04	USP39	10713	GTTGGCAATGAGGTCATAGG	hg38|-chr2:85645004-85645026	TGG	NM_001256725 (Exon11),NM_001256728 (Exon10),NM_001256727 (Exon11),NR_046347 (Exon11),NM_006590 (Exon11)	Q53GS9	SNUT2_HUMAN	U4/U6.U5 tri-snRNP-associated protein 2 (Inactive ubiquitin-specific peptidase 39) (SAD1 homolog) (U4/U6.U5 tri-snRNP-associated 65 kDa protein) (65K)
Plate 1 crRNA 4	G11	CM-004974-04	USP4	7375	CCATCCTCTCATATACAACC	hg38|-chr3:49310675-49310697	TGG	NM_199443.2 (Exon7),NM_003363.3 (Exon8)	Q13107	UBP4_HUMAN	Ubiquitin carboxyl-terminal hydrolase 4 (EC 3.4.19.12) (Deubiquitinating enzyme 4) (Ubiquitin thioesterase 4) (Ubiquitin-specific-processing protease 4) (Ubiquitous nuclear protein homolog)
Plate 1 crRNA 4	H02	CM-006088-04	USP40	55230	CTGAAGAAATCTGGCCTACA	hg38|-chr2:233499878-233499900	AGG	NM_018218 (Exon21)	Q9NVE5	UBP40_HUMAN	Ubiquitin carboxyl-terminal hydrolase 40 (EC 3.4.19.12) (Deubiquitinating enzyme 40) (Ubiquitin thioesterase 40) (Ubiquitin-specific-processing protease 40)
Plate 1 crRNA 4	H03	CM-006089-04	USP42	84132	CGGGAATTCCAGTGTCAACA	hg38|+chr7:6149651-6149673	GGG	NM_032172.2 (Exon13)	Q9H9J4	UBP42_HUMAN	Ubiquitin carboxyl-terminal hydrolase 42 (EC 3.4.19.12) (Deubiquitinating enzyme 42) (Ubiquitin thioesterase 42) (Ubiquitin-specific-processing protease 42)
Plate 1 crRNA 4	H04	CM-023019-04	USP43	124739	CGTGCCGATCCTCAGCACAG	hg38|+chr17:9676809-9676831	TGG	NM_153210 (Exon5),NM_001267576 (Exon5),NM_001267576.1 (Exon5),NM_153210.4 (Exon5)	Q70EL4	UBP43_HUMAN	Ubiquitin carboxyl-terminal hydrolase 43 (EC 3.4.19.12) (Deubiquitinating enzyme 43) (Ubiquitin thioesterase 43) (Ubiquitin-specific-processing protease 43)
Plate 1 crRNA 4	H05	CM-006091-04	USP44	84101	ATCACTGCACAACTCGTAGT	hg38|-chr12:95533906-95533928	GGG	NM_032147 (Exon2),NM_001278393 (Exon2),NM_001042403 (Exon2),NR_125360 (Exon1)	Q9H0E7	UBP44_HUMAN	Ubiquitin carboxyl-terminal hydrolase 44 (EC 3.4.19.12) (Deubiquitinating enzyme 44) (Ubiquitin thioesterase 44) (Ubiquitin-specific-processing protease 44)
Plate 1 crRNA 4	H06	CM-010054-04	USP45	85015	GGTGCTAAATCGAGCATAAG	hg38|+chr6:99439791-99439813	TGG	NM_001080481.1 (Exon16)	Q70EL2	UBP45_HUMAN	Ubiquitin carboxyl-terminal hydrolase 45 (EC 3.4.19.12) (Deubiquitinating enzyme 45) (Ubiquitin thioesterase 45) (Ubiquitin-specific-processing protease 45)
Plate 1 crRNA 4	H07	CM-006092-04	USP46	64854	GTTGCGGTGGTCGTTCACTG	hg38|-chr4:52601860-52601882	TGG	NM_022832 (Exon7),NM_001134223 (Exon7),NM_001286768 (Exon8),NM_001286767 (Exon7)	P62068	UBP46_HUMAN	Ubiquitin carboxyl-terminal hydrolase 46 (EC 3.4.19.12) (Deubiquitinating enzyme 46) (Ubiquitin thioesterase 46) (Ubiquitin-specific-processing protease 46)
Plate 1 crRNA 4	H08	CM-006093-04	USP47	55031	TTTGGATGGGATAGTAGTGA	hg38|+chr11:11902839-11902861	GGG	NM_001282659.1 (Exon6),NM_017944.3 (Exon5)	Q96K76	UBP47_HUMAN	Ubiquitin carboxyl-terminal hydrolase 47 (EC 3.4.19.12) (Deubiquitinating enzyme 47) (Ubiquitin thioesterase 47) (Ubiquitin-specific-processing protease 47)
Plate 1 crRNA 4	H09	CM-006079-04	USP48	84196	TTACGTGTCTGAGACTTAGA	hg38|+chr1:21729805-21729827	AGG	NM_032236.5 (Exon10),NM_001032730.1 (Exon10)	Q86UV5	UBP48_HUMAN	Ubiquitin carboxyl-terminal hydrolase 48 (EC 3.4.19.12) (Deubiquitinating enzyme 48) (Ubiquitin thioesterase 48) (Ubiquitin-specific peptidase 48) (Ubiquitin-specific protease 48) (Ubiquitin-specific-processing protease 48)
Plate 1 crRNA 4	H10	CM-005945-04	USP49	25862	CTTTGACCAGGTATTAACCA	hg38|-chr6:41798862-41798884	TGG	NM_001286554 (Exon5),NM_018561 (Exon7),NM_018561.4 (Exon7),NM_001286554.1 (Exon5)	Q70CQ1	UBP49_HUMAN	Ubiquitin carboxyl-terminal hydrolase 49 (EC 3.4.19.12) (Deubiquitinating enzyme 49) (Ubiquitin thioesterase 49) (Ubiquitin-specific-processing protease 49)
Plate 1 crRNA 4	H11	CM-006095-04	USP5	8078	GCTGAGCACCTGTCCCACTT	hg38|+chr12:6857676-6857698	CGG	NM_001098536.1 (Exon7),NM_003481.2 (Exon7)	P45974	UBP5_HUMAN	Ubiquitin carboxyl-terminal hydrolase 5 (EC 3.4.19.12) (Deubiquitinating enzyme 5) (Isopeptidase T) (Ubiquitin thioesterase 5) (Ubiquitin-specific-processing protease 5)
Plate 2 crRNA 1	A02	CM-031837-01	USP50	373509	TATGAATGCTCCCTTCGGGT	hg38|-chr15:50541044-50541066	AGG	NM_203494.4 (Exon4)	Q70EL3	UBP50_HUMAN	Inactive ubiquitin carboxyl-terminal hydrolase 50 (Inactive ubiquitin-specific peptidase 50)
Plate 2 crRNA 1	A03	CM-032247-01	USP51	158880	ATCAGATGCAGTAACTTATA	hg38|+chrX:55487636-55487658	GGG	NM_201286 (Exon2)	Q70EK9	UBP51_HUMAN	Ubiquitin carboxyl-terminal hydrolase 51 (EC 3.4.19.12) (Deubiquitinating enzyme 51) (Ubiquitin thioesterase 51) (Ubiquitin-specific-processing protease 51)
Plate 2 crRNA 1	A04	CM-021192-01	PAN2	9924	TTGAGTCTGTAGGGTATCTA	hg38|+chr12:56325438-56325460	GGG	NM_001127460.2 (Exon9),NM_014871.4 (Exon9),NM_001166279.1 (Exon9)	Q504Q3	PAN2_HUMAN	PAN2-PAN3 deadenylation complex catalytic subunit PAN2 (EC 3.1.13.4) (Inactive ubiquitin carboxyl-terminal hydrolase 52) (PAB1P-dependent poly(A)-specific ribonuclease) (Poly(A)-nuclease deadenylation complex subunit 2) (PAN deadenylation complex subunit 2)
Plate 2 crRNA 1	A05	CM-027186-01	USP53	54532	CATGCACTTTACCCTCTACA	hg38|-chr4:119271864-119271886	AGG	NM_019050.2 (Exon15)	Q70EK8	UBP53_HUMAN	Inactive ubiquitin carboxyl-terminal hydrolase 53 (Inactive ubiquitin-specific peptidase 53)
Plate 2 crRNA 1	A06	CM-016853-01	USP54	159195	CATGAAGACTGCTAGATGGT	hg38|+chr10:73498850-73498872	GGG	NM_152586.3 (Exon22)	Q70EL1	UBP54_HUMAN	Inactive ubiquitin carboxyl-terminal hydrolase 54 (Inactive ubiquitin-specific peptidase 54)
Plate 2 crRNA 1	A07	CM-006096-01	USP6	9098	GTGCCAATCCACAGCAATAT	hg38|-chr17:5162940-5162962	AGG	NM_004505 (Exon25)	P35125	UBP6_HUMAN	Ubiquitin carboxyl-terminal hydrolase 6 (EC 3.4.19.12) (Deubiquitinating enzyme 6) (Proto-oncogene TRE-2) (Ubiquitin thioesterase 6) (Ubiquitin-specific-processing protease 6)
Plate 2 crRNA 1	A08	CM-006097-01	USP7	7874	CTGCTGAGGAATATCATGGT	hg38|+chr16:8904522-8904544	CGG	NM_001286458 (Exon16),NM_001286457 (Exon15),NM_003470 (Exon15),NM_001286458.1 (Exon16),NM_001286457.1 (Exon15),NM_003470.2 (Exon15)	Q93009	UBP7_HUMAN	Ubiquitin carboxyl-terminal hydrolase 7 (EC 3.4.19.12) (Deubiquitinating enzyme 7) (Herpesvirus-associated ubiquitin-specific protease) (Ubiquitin thioesterase 7) (Ubiquitin-specific-processing protease 7)
Plate 2 crRNA 1	A09	CM-005203-01	USP8	9101	TATAGATGCAGGTGGCGTCT	hg38|-chr15:50477327-50477349	GGG	NM_005154.4 (Exon10),NM_001283049.1 (Exon8),NM_001128610.2 (Exon10)	P40818	UBP8_HUMAN	Ubiquitin carboxyl-terminal hydrolase 8 (EC 3.4.19.12) (Deubiquitinating enzyme 8) (Ubiquitin isopeptidase Y) (hUBPy) (Ubiquitin thioesterase 8) (Ubiquitin-specific-processing protease 8)
Plate 2 crRNA 1	A10	CM-006099-01	USP9X	8239	GTCGGAGGGAATGACAACCA	hg38|+chrX:41123656-41123678	GGG	NM_001039590.2 (Exon2),NM_001039591.2 (Exon2)	Q93008	USP9X_HUMAN	Probable ubiquitin carboxyl-terminal hydrolase FAF-X (EC 3.4.19.12) (Deubiquitinating enzyme FAF-X) (Fat facets in mammals) (hFAM) (Fat facets protein-related, X-linked) (Ubiquitin thioesterase FAF-X) (Ubiquitin-specific protease 9, X chromosome) (Ubiquitin-specific-processing protease FAF-X)
Plate 2 crRNA 1	A11	CM-006100-01	USP9Y	8287	CTTCACACAAACCTCGACAT	hg38|-chrY:12776850-12776872	AGG	NM_004654.3 (Exon19)	O00507	USP9Y_HUMAN	Probable ubiquitin carboxyl-terminal hydrolase FAF-Y (EC 3.4.19.12) (Deubiquitinating enzyme FAF-Y) (Fat facets protein-related, Y-linked) (Ubiquitin thioesterase FAF-Y) (Ubiquitin-specific protease 9, Y chromosome) (Ubiquitin-specific-processing protease FAF-Y)
Plate 2 crRNA 1	B02	CM-017741-01	USPL1	10208	GATGCTACTGGTCTTATACA	hg38|+chr13:30658124-30658146	GGG	NM_005800.4 (Exon9),NM_005800.4 (Exon9)	Q5W0Q7	USPL1_HUMAN	SUMO-specific isopeptidase USPL1 (EC 3.4.22.-) (Ubiquitin-specific peptidase-like protein 1) (USP-like 1)
Plate 2 crRNA 1	B03	CM-019137-01	VCPIP1	80124	CTGTTCGATTGCGCCTTACT	hg38|-chr8:66666468-66666490	GGG	NM_025054.4 (Exon1)	Q96JH7	VCIP1_HUMAN	Deubiquitinating protein VCIP135 (EC 3.4.19.12) (Valosin-containing protein p97/p47 complex-interacting protein 1) (Valosin-containing protein p97/p47 complex-interacting protein p135) (VCP/p47 complex-interacting 135-kDa protein)
Plate 2 crRNA 1	B04	CM-027369-01	YOD1	55432	CTTGCCCATCCAATCTGGTA	hg38|-chr1:207050682-207050704	AGG	NM_001276320 (Exon3),NM_018566 (Exon1)	Q5VVQ6	OTU1_HUMAN	Ubiquitin thioesterase OTU1 (EC 3.4.19.12) (DUBA-8) (HIV-1-induced protease 7) (HIN-7) (HsHIN7) (OTU domain-containing protein 2)
Plate 2 crRNA 1	B05	CM-009270-01	ZRANB1	54764	ATGAGCAAGACAGAGCTCGA	hg38|+chr10:124943080-124943102	TGG	NM_017580.2 (Exon1)	Q9UGI0	ZRAN1_HUMAN	Ubiquitin thioesterase ZRANB1 (EC 3.4.19.12) (TRAF-binding domain-containing protein) (hTrabid) (Zinc finger Ran-binding domain-containing protein 1)
Plate 2 crRNA 2	A02	CM-031837-02	USP50	373509	ATGATCTTCTCCGGGAGTAG	hg38|+chr15:50541240-50541262	TGG	NM_203494.4 (Exon4)	Q70EL3	UBP50_HUMAN	Inactive ubiquitin carboxyl-terminal hydrolase 50 (Inactive ubiquitin-specific peptidase 50)
Plate 2 crRNA 2	A03	CM-032247-02	USP51	158880	CTATGGTGGTAGAAACACTA	hg38|+chrX:55487415-55487437	TGG	NM_201286 (Exon2)	Q70EK9	UBP51_HUMAN	Ubiquitin carboxyl-terminal hydrolase 51 (EC 3.4.19.12) (Deubiquitinating enzyme 51) (Ubiquitin thioesterase 51) (Ubiquitin-specific-processing protease 51)
Plate 2 crRNA 2	A04	CM-021192-02	PAN2	9924	ATGTGCACTGATTCCTGGAC	hg38|+chr12:56332925-56332947	GGG	NM_001127460.2 (Exon2),NM_014871.4 (Exon2),NM_001166279.1 (Exon2)	Q504Q3	PAN2_HUMAN	PAN2-PAN3 deadenylation complex catalytic subunit PAN2 (EC 3.1.13.4) (Inactive ubiquitin carboxyl-terminal hydrolase 52) (PAB1P-dependent poly(A)-specific ribonuclease) (Poly(A)-nuclease deadenylation complex subunit 2) (PAN deadenylation complex subunit 2)
Plate 2 crRNA 2	A05	CM-027186-02	USP53	54532	AATCGGAGCCACAGTCACAC	hg38|+chr4:119268381-119268403	AGG	NM_019050.2 (Exon13)	Q70EK8	UBP53_HUMAN	Inactive ubiquitin carboxyl-terminal hydrolase 53 (Inactive ubiquitin-specific peptidase 53)
Plate 2 crRNA 2	A06	CM-016853-02	USP54	159195	GAGTTACCTGGGAGTCTATT	hg38|+chr10:73500648-73500670	GGG	NM_152586.3 (Exon21)	Q70EL1	UBP54_HUMAN	Inactive ubiquitin carboxyl-terminal hydrolase 54 (Inactive ubiquitin-specific peptidase 54)
Plate 2 crRNA 2	A07	CM-006096-02	USP6	9098	TCCCAACGGACCTGGATATA	hg38|+chr17:5139546-5139568	GGG	NM_004505 (Exon14)	P35125	UBP6_HUMAN	Ubiquitin carboxyl-terminal hydrolase 6 (EC 3.4.19.12) (Deubiquitinating enzyme 6) (Proto-oncogene TRE-2) (Ubiquitin thioesterase 6) (Ubiquitin-specific-processing protease 6)
Plate 2 crRNA 2	A08	CM-006097-02	USP7	7874	TAACTGGGAGCAAGTCACCT	hg38|+chr16:8901040-8901062	AGG	NM_001286458 (Exon21),NM_001286457 (Exon20),NM_003470 (Exon20),NM_001286458.1 (Exon21),NM_001286457.1 (Exon20),NM_003470.2 (Exon20)	Q93009	UBP7_HUMAN	Ubiquitin carboxyl-terminal hydrolase 7 (EC 3.4.19.12) (Deubiquitinating enzyme 7) (Herpesvirus-associated ubiquitin-specific protease) (Ubiquitin thioesterase 7) (Ubiquitin-specific-processing protease 7)
Plate 2 crRNA 2	A09	CM-005203-02	USP8	9101	TTGTTTCCACCTGCCATCGT	hg38|-chr15:50498601-50498623	AGG	NM_005154.4 (Exon19),NM_001283049.1 (Exon16),NM_001128610.2 (Exon19)	P40818	UBP8_HUMAN	Ubiquitin carboxyl-terminal hydrolase 8 (EC 3.4.19.12) (Deubiquitinating enzyme 8) (Ubiquitin isopeptidase Y) (hUBPy) (Ubiquitin thioesterase 8) (Ubiquitin-specific-processing protease 8)
Plate 2 crRNA 2	A10	CM-006099-02	USP9X	8239	GACGTGTACCATTGTAGATA	hg38|-chrX:41136920-41136942	TGG	NM_001039590.2 (Exon6),NM_001039591.2 (Exon6)	Q93008	USP9X_HUMAN	Probable ubiquitin carboxyl-terminal hydrolase FAF-X (EC 3.4.19.12) (Deubiquitinating enzyme FAF-X) (Fat facets in mammals) (hFAM) (Fat facets protein-related, X-linked) (Ubiquitin thioesterase FAF-X) (Ubiquitin-specific protease 9, X chromosome) (Ubiquitin-specific-processing protease FAF-X)
Plate 2 crRNA 2	A11	CM-006100-02	USP9Y	8287	CTCTTCCAACAGAACCAGGT	hg38|+chrY:12709526-12709548	AGG	NM_004654.3 (Exon3)	O00507	USP9Y_HUMAN	Probable ubiquitin carboxyl-terminal hydrolase FAF-Y (EC 3.4.19.12) (Deubiquitinating enzyme FAF-Y) (Fat facets protein-related, Y-linked) (Ubiquitin thioesterase FAF-Y) (Ubiquitin-specific protease 9, Y chromosome) (Ubiquitin-specific-processing protease FAF-Y)
Plate 2 crRNA 2	B02	CM-017741-02	USPL1	10208	TTGGACCAGGGACTGATATA	hg38|+chr13:30621181-30621203	GGG	NM_005800.4 (Exon2),NM_005800.4 (Exon2)	Q5W0Q7	USPL1_HUMAN	SUMO-specific isopeptidase USPL1 (EC 3.4.22.-) (Ubiquitin-specific peptidase-like protein 1) (USP-like 1)
Plate 2 crRNA 2	B03	CM-019137-02	VCPIP1	80124	GCTGTGTCTCGGGCTCTAGT	hg38|-chr8:66666270-66666292	AGG	NM_025054.4 (Exon1)	Q96JH7	VCIP1_HUMAN	Deubiquitinating protein VCIP135 (EC 3.4.19.12) (Valosin-containing protein p97/p47 complex-interacting protein 1) (Valosin-containing protein p97/p47 complex-interacting protein p135) (VCP/p47 complex-interacting 135-kDa protein)
Plate 2 crRNA 2	B04	CM-027369-02	YOD1	55432	TGGTGCTTCTAGTTACGTCA	hg38|-chr1:207049637-207049659	GGG	NM_001276320 (Exon4),NM_018566 (Exon2)	Q5VVQ6	OTU1_HUMAN	Ubiquitin thioesterase OTU1 (EC 3.4.19.12) (DUBA-8) (HIV-1-induced protease 7) (HIN-7) (HsHIN7) (OTU domain-containing protein 2)
Plate 2 crRNA 2	B05	CM-009270-02	ZRANB1	54764	TCCAAGGACCAGTTAATAAT	hg38|-chr10:124974217-124974239	TGG	NM_017580.2 (Exon5)	Q9UGI0	ZRAN1_HUMAN	Ubiquitin thioesterase ZRANB1 (EC 3.4.19.12) (TRAF-binding domain-containing protein) (hTrabid) (Zinc finger Ran-binding domain-containing protein 1)
Plate 2 crRNA 3	A02	CM-031837-03	USP50	373509	CCACATGTCTGTCATCAGAT	hg38|+chr15:50543742-50543764	AGG	NM_203494.4 (Exon3)	Q70EL3	UBP50_HUMAN	Inactive ubiquitin carboxyl-terminal hydrolase 50 (Inactive ubiquitin-specific peptidase 50)
Plate 2 crRNA 3	A03	CM-032247-03	USP51	158880	CATGTGGAGAGCTTTAAAGT	hg38|-chrX:55488329-55488351	AGG	NM_201286 (Exon2)	Q70EK9	UBP51_HUMAN	Ubiquitin carboxyl-terminal hydrolase 51 (EC 3.4.19.12) (Deubiquitinating enzyme 51) (Ubiquitin thioesterase 51) (Ubiquitin-specific-processing protease 51)
Plate 2 crRNA 3	A04	CM-021192-03	PAN2	9924	TCTGACTCCTTGAGTCTGTA	hg38|+chr12:56325429-56325451	GGG	NM_001127460.2 (Exon9),NM_014871.4 (Exon9),NM_001166279.1 (Exon9)	Q504Q3	PAN2_HUMAN	PAN2-PAN3 deadenylation complex catalytic subunit PAN2 (EC 3.1.13.4) (Inactive ubiquitin carboxyl-terminal hydrolase 52) (PAB1P-dependent poly(A)-specific ribonuclease) (Poly(A)-nuclease deadenylation complex subunit 2) (PAN deadenylation complex subunit 2)
Plate 2 crRNA 3	A05	CM-027186-03	USP53	54532	TTGACTGGACATGTTTGTCA	hg38|+chr4:119245379-119245401	GGG	NM_019050.2 (Exon5)	Q70EK8	UBP53_HUMAN	Inactive ubiquitin carboxyl-terminal hydrolase 53 (Inactive ubiquitin-specific peptidase 53)
Plate 2 crRNA 3	A06	CM-016853-03	USP54	159195	GGTACATGAAGACTGCTAGA	hg38|+chr10:73498846-73498868	TGG	NM_152586.3 (Exon22)	Q70EL1	UBP54_HUMAN	Inactive ubiquitin carboxyl-terminal hydrolase 54 (Inactive ubiquitin-specific peptidase 54)
Plate 2 crRNA 3	A07	CM-006096-03	USP6	9098	GATTCCACAGCCCAAATGGT	hg38|+chr17:5136640-5136662	GGG	NM_004505 (Exon10)	P35125	UBP6_HUMAN	Ubiquitin carboxyl-terminal hydrolase 6 (EC 3.4.19.12) (Deubiquitinating enzyme 6) (Proto-oncogene TRE-2) (Ubiquitin thioesterase 6) (Ubiquitin-specific-processing protease 6)
Plate 2 crRNA 3	A08	CM-006097-03	USP7	7874	CCACAAATCCAGGATCATTA	hg38|+chr16:8899636-8899658	GGG	NM_001286458 (Exon23),NM_001286457 (Exon22),NM_003470 (Exon22),NM_001286458.1 (Exon23),NM_001286457.1 (Exon22),NM_003470.2 (Exon22)	Q93009	UBP7_HUMAN	Ubiquitin carboxyl-terminal hydrolase 7 (EC 3.4.19.12) (Deubiquitinating enzyme 7) (Herpesvirus-associated ubiquitin-specific protease) (Ubiquitin thioesterase 7) (Ubiquitin-specific-processing protease 7)
Plate 2 crRNA 3	A09	CM-005203-03	USP8	9101	TACATATGAACAGTGTTGGT	hg38|-chr15:50490305-50490327	GGG	NM_005154.4 (Exon14),NM_001283049.1 (Exon11),NM_001128610.2 (Exon14)	P40818	UBP8_HUMAN	Ubiquitin carboxyl-terminal hydrolase 8 (EC 3.4.19.12) (Deubiquitinating enzyme 8) (Ubiquitin isopeptidase Y) (hUBPy) (Ubiquitin thioesterase 8) (Ubiquitin-specific-processing protease 8)
Plate 2 crRNA 3	A10	CM-006099-03	USP9X	8239	TGCATTTCCACATACTGACT	hg38|+chrX:41129098-41129120	TGG	NM_001039590.2 (Exon3),NM_001039591.2 (Exon3)	Q93008	USP9X_HUMAN	Probable ubiquitin carboxyl-terminal hydrolase FAF-X (EC 3.4.19.12) (Deubiquitinating enzyme FAF-X) (Fat facets in mammals) (hFAM) (Fat facets protein-related, X-linked) (Ubiquitin thioesterase FAF-X) (Ubiquitin-specific protease 9, X chromosome) (Ubiquitin-specific-processing protease FAF-X)
Plate 2 crRNA 3	A11	CM-006100-03	USP9Y	8287	TAAATATGGCCGAAGTTCAT	hg38|-chrY:12847255-12847277	AGG	NM_004654.3 (Exon42)	O00507	USP9Y_HUMAN	Probable ubiquitin carboxyl-terminal hydrolase FAF-Y (EC 3.4.19.12) (Deubiquitinating enzyme FAF-Y) (Fat facets protein-related, Y-linked) (Ubiquitin thioesterase FAF-Y) (Ubiquitin-specific protease 9, Y chromosome) (Ubiquitin-specific-processing protease FAF-Y)
Plate 2 crRNA 3	B02	CM-017741-03	USPL1	10208	GTGGTCAACAGAATCCAATT	hg38|+chr13:30631076-30631098	AGG	NM_005800.4 (Exon4),NM_005800.4 (Exon4)	Q5W0Q7	USPL1_HUMAN	SUMO-specific isopeptidase USPL1 (EC 3.4.22.-) (Ubiquitin-specific peptidase-like protein 1) (USP-like 1)
Plate 2 crRNA 3	B03	CM-019137-03	VCPIP1	80124	ATGGAACAGAGCTTGATATC	hg38|+chr8:66666185-66666207	GGG	NM_025054.4 (Exon1)	Q96JH7	VCIP1_HUMAN	Deubiquitinating protein VCIP135 (EC 3.4.19.12) (Valosin-containing protein p97/p47 complex-interacting protein 1) (Valosin-containing protein p97/p47 complex-interacting protein p135) (VCP/p47 complex-interacting 135-kDa protein)
Plate 2 crRNA 3	B04	CM-027369-03	YOD1	55432	GTGAACTTCTGGGCCTGGTT	hg38|+chr1:207049676-207049698	TGG	NM_001276320 (Exon4),NM_018566 (Exon2)	Q5VVQ6	OTU1_HUMAN	Ubiquitin thioesterase OTU1 (EC 3.4.19.12) (DUBA-8) (HIV-1-induced protease 7) (HIN-7) (HsHIN7) (OTU domain-containing protein 2)
Plate 2 crRNA 3	B05	CM-009270-03	ZRANB1	54764	GCCTGCATGACTGTTCACAT	hg38|+chr10:124974377-124974399	TGG	NM_017580.2 (Exon5)	Q9UGI0	ZRAN1_HUMAN	Ubiquitin thioesterase ZRANB1 (EC 3.4.19.12) (TRAF-binding domain-containing protein) (hTrabid) (Zinc finger Ran-binding domain-containing protein 1)
Plate 2 crRNA 4	A02	CM-031837-04	USP50	373509	AGTGAAGACTTCGTTCTTGT	hg38|+chr15:50541094-50541116	AGG	NM_203494.4 (Exon4)	Q70EL3	UBP50_HUMAN	Inactive ubiquitin carboxyl-terminal hydrolase 50 (Inactive ubiquitin-specific peptidase 50)
Plate 2 crRNA 4	A03	CM-032247-04	USP51	158880	ACTGTCTACAGTGGTTTACA	hg38|-chrX:55487266-55487288	AGG	NM_201286 (Exon2)	Q70EK9	UBP51_HUMAN	Ubiquitin carboxyl-terminal hydrolase 51 (EC 3.4.19.12) (Deubiquitinating enzyme 51) (Ubiquitin thioesterase 51) (Ubiquitin-specific-processing protease 51)
Plate 2 crRNA 4	A04	CM-021192-04	PAN2	9924	GCACGGTCTCACTGCCACAG	hg38|+chr12:56324091-56324113	CGG	NM_001127460.2 (Exon13),NM_014871.4 (Exon13),NM_001166279.1 (Exon13)	Q504Q3	PAN2_HUMAN	PAN2-PAN3 deadenylation complex catalytic subunit PAN2 (EC 3.1.13.4) (Inactive ubiquitin carboxyl-terminal hydrolase 52) (PAB1P-dependent poly(A)-specific ribonuclease) (Poly(A)-nuclease deadenylation complex subunit 2) (PAN deadenylation complex subunit 2)
Plate 2 crRNA 4	A05	CM-027186-04	USP53	54532	GTGAGTGATACAAGATTTAG	hg38|-chr4:119256307-119256329	AGG	NM_019050.2 (Exon7)	Q70EK8	UBP53_HUMAN	Inactive ubiquitin carboxyl-terminal hydrolase 53 (Inactive ubiquitin-specific peptidase 53)
Plate 2 crRNA 4	A06	CM-016853-04	USP54	159195	ACACAGGATGAACAATGGGA	hg38|+chr10:73498874-73498896	GGG	NM_152586.3 (Exon22)	Q70EL1	UBP54_HUMAN	Inactive ubiquitin carboxyl-terminal hydrolase 54 (Inactive ubiquitin-specific peptidase 54)
Plate 2 crRNA 4	A07	CM-006096-04	USP6	9098	GCTGTGTGTTACTAACGCAC	hg38|-chr17:5142070-5142092	TGG	NM_004505 (Exon16)	P35125	UBP6_HUMAN	Ubiquitin carboxyl-terminal hydrolase 6 (EC 3.4.19.12) (Deubiquitinating enzyme 6) (Proto-oncogene TRE-2) (Ubiquitin thioesterase 6) (Ubiquitin-specific-processing protease 6)
Plate 2 crRNA 4	A08	CM-006097-04	USP7	7874	TATGTCTAAGAGGATTACCT	hg38|+chr16:8898605-8898627	GGG	NM_001286458 (Exon25),NM_001286457 (Exon24),NM_003470 (Exon24),NM_001286458.1 (Exon25),NM_001286457.1 (Exon24),NM_003470.2 (Exon24)	Q93009	UBP7_HUMAN	Ubiquitin carboxyl-terminal hydrolase 7 (EC 3.4.19.12) (Deubiquitinating enzyme 7) (Herpesvirus-associated ubiquitin-specific protease) (Ubiquitin thioesterase 7) (Ubiquitin-specific-processing protease 7)
Plate 2 crRNA 4	A09	CM-005203-04	USP8	9101	TGTGGAACATTCTTTATACT	hg38|-chr15:50477476-50477498	AGG	NM_005154.4 (Exon10),NM_001283049.1 (Exon8),NM_001128610.2 (Exon10)	P40818	UBP8_HUMAN	Ubiquitin carboxyl-terminal hydrolase 8 (EC 3.4.19.12) (Deubiquitinating enzyme 8) (Ubiquitin isopeptidase Y) (hUBPy) (Ubiquitin thioesterase 8) (Ubiquitin-specific-processing protease 8)
Plate 2 crRNA 4	A10	CM-006099-04	USP9X	8239	ACATACTGACTTGGCCAAGT	hg38|+chrX:41129107-41129129	TGG	NM_001039590.2 (Exon3),NM_001039591.2 (Exon3)	Q93008	USP9X_HUMAN	Probable ubiquitin carboxyl-terminal hydrolase FAF-X (EC 3.4.19.12) (Deubiquitinating enzyme FAF-X) (Fat facets in mammals) (hFAM) (Fat facets protein-related, X-linked) (Ubiquitin thioesterase FAF-X) (Ubiquitin-specific protease 9, X chromosome) (Ubiquitin-specific-processing protease FAF-X)
Plate 2 crRNA 4	A11	CM-006100-04	USP9Y	8287	CATGCAATTACCTGACTAGA	hg38|-chrY:12842454-12842476	AGG	NM_004654.3 (Exon38)	O00507	USP9Y_HUMAN	Probable ubiquitin carboxyl-terminal hydrolase FAF-Y (EC 3.4.19.12) (Deubiquitinating enzyme FAF-Y) (Fat facets protein-related, Y-linked) (Ubiquitin thioesterase FAF-Y) (Ubiquitin-specific protease 9, Y chromosome) (Ubiquitin-specific-processing protease FAF-Y)
Plate 2 crRNA 4	B02	CM-017741-04	USPL1	10208	ATGAGTTTGACTACTGTACA	hg38|-chr13:30658959-30658981	GGG	NM_005800.4 (Exon9),NM_005800.4 (Exon9)	Q5W0Q7	USPL1_HUMAN	SUMO-specific isopeptidase USPL1 (EC 3.4.22.-) (Ubiquitin-specific peptidase-like protein 1) (USP-like 1)
Plate 2 crRNA 4	B03	CM-019137-04	VCPIP1	80124	GGTGAATAGGGAGCCTTGGT	hg38|+chr8:66664653-66664675	AGG	NM_025054.4 (Exon1)	Q96JH7	VCIP1_HUMAN	Deubiquitinating protein VCIP135 (EC 3.4.19.12) (Valosin-containing protein p97/p47 complex-interacting protein 1) (Valosin-containing protein p97/p47 complex-interacting protein p135) (VCP/p47 complex-interacting 135-kDa protein)
Plate 2 crRNA 4	B04	CM-027369-04	YOD1	55432	GTGTACTATGTCGTCGAAGG	hg38|-chr1:207049552-207049574	AGG	NM_001276320 (Exon4),NM_018566 (Exon2)	Q5VVQ6	OTU1_HUMAN	Ubiquitin thioesterase OTU1 (EC 3.4.19.12) (DUBA-8) (HIV-1-induced protease 7) (HIN-7) (HsHIN7) (OTU domain-containing protein 2)
Plate 2 crRNA 4	B05	CM-009270-04	ZRANB1	54764	ATGTACACGGCCGGATCTGT	hg38|-chr10:124984926-124984948	CGG	NM_017580.2 (Exon9)	Q9UGI0	ZRAN1_HUMAN	Ubiquitin thioesterase ZRANB1 (EC 3.4.19.12) (TRAF-binding domain-containing protein) (hTrabid) (Zinc finger Ran-binding domain-containing protein 1)

## Sheet: individual guides
guide	gene	Manufacturer	Catalog number	UniprotID	Entry name	Protein names
Edit-R CRISPR (knockout) Human C16orf72 crRNA #4 Edit	C16orf72	Dharmacon RNAi Technologies	CM-031072-04-0002	CP072_HUMAN	UPF0472 protein C16orf72
Edit-R CRISPR (knockout) Human C16orf72 crRNA #3 Edit	C16orf72	Dharmacon RNAi Technologies	CM-031072-03-0002	CP072_HUMAN	UPF0472 protein C16orf72
Edit-R CRISPR (knockout) Human C16orf72 crRNA #2 Edit	C16orf72	Dharmacon RNAi Technologies	CM-031072-02-0002	CP072_HUMAN	UPF0472 protein C16orf72
Edit-R CRISPR (knockout) Human C16orf72 crRNA #1 Edit	C16orf72	Dharmacon RNAi Technologies	CM-031072-01-0002	CP072_HUMAN	UPF0472 protein C16orf72
Edit-R Human EAF1 crRNA #1	EAF1	Dharmacon RNAi Technologies	CM-019284-01-0002	Q96JC9	EAF1_HUMAN	ELL-associated factor 1
Edit-R Human EAF1 crRNA #2	EAF1	Dharmacon RNAi Technologies	CM-019284-02-0002	Q96JC9	EAF1_HUMAN	ELL-associated factor 1
Edit-R CRISPR (knockout) Human EAF1 crRNA #4 Edit	EAF1	Dharmacon RNAi Technologies	CM-019284-04-0002	Q96JC9	EAF1_HUMAN	ELL-associated factor 1
Edit-R CRISPR (knockout) Human EAF1 crRNA #3 Edit	EAF1	Dharmacon RNAi Technologies	CM-019284-03-0002	Q96JC9	EAF1_HUMAN	ELL-associated factor 1
Edit-R Human ELL crRNA #1	ELL	Dharmacon RNAi Technologies	CM-008176-01-0002	P55199	ELL_HUMAN	RNA polymerase II elongation factor ELL (Eleven-nineteen lysine-rich leukemia protein)
Edit-R Human ELL crRNA #2	ELL	Dharmacon RNAi Technologies	CM-008176-02-0002	P55199	ELL_HUMAN	RNA polymerase II elongation factor ELL (Eleven-nineteen lysine-rich leukemia protein)
Edit-R CRISPR (knockout) Human ELL crRNA #4 Edit	ELL	Dharmacon RNAi Technologies	CM-008176-04-0002	P55199	ELL_HUMAN	RNA polymerase II elongation factor ELL (Eleven-nineteen lysine-rich leukemia protein)
Edit-R CRISPR (knockout) Human ELL crRNA #3 Edit	ELL	Dharmacon RNAi Technologies	CM-008176-03-0002	P55199	ELL_HUMAN	RNA polymerase II elongation factor ELL (Eleven-nineteen lysine-rich leukemia protein)
Edit-R CRISPR (knockout) Human HGS crRNA #4 Edit	HGS	Dharmacon RNAi Technologies	CM-016835-04-0002	O14964	HGS_HUMAN	Hepatocyte growth factor-regulated tyrosine kinase substrate (Hrs) (Protein pp110)
Edit-R CRISPR (knockout) Human HGS crRNA #3 Edit	HGS	Dharmacon RNAi Technologies	CM-016835-03-0002	O14964	HGS_HUMAN	Hepatocyte growth factor-regulated tyrosine kinase substrate (Hrs) (Protein pp110)
Edit-R CRISPR (knockout) Human HGS crRNA #2 Edit	HGS	Dharmacon RNAi Technologies	CM-016835-02-0002	O14964	HGS_HUMAN	Hepatocyte growth factor-regulated tyrosine kinase substrate (Hrs) (Protein pp110)
Edit-R CRISPR (knockout) Human HGS crRNA #1 Edit	HGS	Dharmacon RNAi Technologies	CM-016835-01-0002	O14964	HGS_HUMAN	Hepatocyte growth factor-regulated tyrosine kinase substrate (Hrs) (Protein pp110)
Edit-R Human ICE1 crRNA #2	ICE1	Dharmacon RNAi Technologies	CM-024272-02-0002	Q9Y2F5	ICE1_HUMAN	Little elongation complex subunit 1 (Interactor of little elongator complex ELL subunit 1)
Edit-R Human ICE1 crRNA #1	ICE1	Dharmacon RNAi Technologies	CM-024272-01-0002	Q9Y2F5	ICE1_HUMAN	Little elongation complex subunit 1 (Interactor of little elongator complex ELL subunit 1)
Edit-R CRISPR (knockout) Human ICE1 crRNA #4 Edit	ICE1	Dharmacon RNAi Technologies	CM-024272-04-0002	Q9Y2F5	ICE1_HUMAN	Little elongation complex subunit 1 (Interactor of little elongator complex ELL subunit 1)
Edit-R CRISPR (knockout) Human ICE1 crRNA #3 Edit	ICE1	Dharmacon RNAi Technologies	CM-024272-03-0002	Q9Y2F5	ICE1_HUMAN	Little elongation complex subunit 1 (Interactor of little elongator complex ELL subunit 1)
Edit-R Human ICE2 crRNA #2	ICE2	Dharmacon RNAi Technologies	CM-014387-02-0002	Q659A1	ICE2_HUMAN	Little elongation complex subunit 2 (Interactor of little elongator complex ELL subunit 2) (NMDA receptor-regulated protein 2)
Edit-R Human ICE2 crRNA #1	ICE2	Dharmacon RNAi Technologies	CM-014387-01-0002	Q659A1	ICE2_HUMAN	Little elongation complex subunit 2 (Interactor of little elongator complex ELL subunit 2) (NMDA receptor-regulated protein 2)
Edit-R CRISPR (knockout) Human ICE2 crRNA #4 Edit	ICE2	Dharmacon RNAi Technologies	CM-014387-04-0002	Q659A1	ICE2_HUMAN	Little elongation complex subunit 2 (Interactor of little elongator complex ELL subunit 2) (NMDA receptor-regulated protein 2)
Edit-R CRISPR (knockout) Human ICE2 crRNA #3 Edit	ICE2	Dharmacon RNAi Technologies	CM-014387-03-0002	Q659A1	ICE2_HUMAN	Little elongation complex subunit 2 (Interactor of little elongator complex ELL subunit 2) (NMDA receptor-regulated protein 2)
Edit-R crRNA Non-targeting Control #4	non-targeting	Dharmacon RNAi Technologies	U-007504-01-05	NA	NA	NA
Edit-R crRNA Non-targeting Control #3	non-targeting	Dharmacon RNAi Technologies	U-007503-01-05	NA	NA	NA
Edit-R crRNA Non-targeting Control #2	non-targeting	Dharmacon RNAi Technologies	U-007502-01-05	NA	NA	NA
Edit-R crRNA Non-targeting Control #1	non-targeting	Dharmacon RNAi Technologies	U-007501-01-05	NA	NA	NA
Edit-R CRISPR (knockout) Human PTPN23 crRNA #4 Edit	PTPN23	Dharmacon RNAi Technologies	CM-009417-04-0002	Q9H3S7	PTN23_HUMAN	Tyrosine-protein phosphatase non-receptor type 23 (EC 3.1.3.48) (His domain-containing protein tyrosine phosphatase) (HD-PTP) (Protein tyrosine phosphatase TD14) (PTP-TD14)
Edit-R CRISPR (knockout) Human PTPN23 crRNA #3 Edit	PTPN23	Dharmacon RNAi Technologies	CM-009417-03-0002	Q9H3S7	PTN23_HUMAN	Tyrosine-protein phosphatase non-receptor type 23 (EC 3.1.3.48) (His domain-containing protein tyrosine phosphatase) (HD-PTP) (Protein tyrosine phosphatase TD14) (PTP-TD14)
Edit-R CRISPR (knockout) Human PTPN23 crRNA #2 Edit	PTPN23	Dharmacon RNAi Technologies	CM-009417-02-0002	Q9H3S7	PTN23_HUMAN	Tyrosine-protein phosphatase non-receptor type 23 (EC 3.1.3.48) (His domain-containing protein tyrosine phosphatase) (HD-PTP) (Protein tyrosine phosphatase TD14) (PTP-TD14)
Edit-R CRISPR (knockout) Human PTPN23 crRNA #1 Edit	PTPN23	Dharmacon RNAi Technologies	CM-009417-01-0002	Q9H3S7	PTN23_HUMAN	Tyrosine-protein phosphatase non-receptor type 23 (EC 3.1.3.48) (His domain-containing protein tyrosine phosphatase) (HD-PTP) (Protein tyrosine phosphatase TD14) (PTP-TD14)
Edit-R CRISPR (knockout) Human UBAP1 crRNA #3 Edit	UBAP1	Dharmacon RNAi Technologies	CM-017474-03-0002	Q9NZ09	UBAP1_HUMAN	Ubiquitin-associated protein 1 (UBAP-1) (Nasopharyngeal carcinoma-associated gene 20 protein)
Edit-R CRISPR (knockout) Human UBAP1 crRNA #4 Edit	UBAP1	Dharmacon RNAi Technologies	CM-017474-04-0002	Q9NZ09	UBAP1_HUMAN	Ubiquitin-associated protein 1 (UBAP-1) (Nasopharyngeal carcinoma-associated gene 20 protein)
Edit-R CRISPR (knockout) Human UBAP1 crRNA #2 Edit	UBAP1	Dharmacon RNAi Technologies	CM-017474-02-0002	Q9NZ09	UBAP1_HUMAN	Ubiquitin-associated protein 1 (UBAP-1) (Nasopharyngeal carcinoma-associated gene 20 protein)
Edit-R CRISPR (knockout) Human UBAP1 crRNA #1 Edit	UBAP1	Dharmacon RNAi Technologies	CM-017474-01-0002	Q9NZ09	UBAP1_HUMAN	Ubiquitin-associated protein 1 (UBAP-1) (Nasopharyngeal carcinoma-associated gene 20 protein)
Edit-R CRISPR-Cas9 Synthetic tracrRNA	combine with synthetic guides to make double stranded	Dharmacon RNAi Technologies	U-002005-05	NA	NA	NA
